# Supplementary material
Source: PubMed Central journal article supplement (PMC11071780)
Supplement: 18_2020_3610_MOESM1_ESM.pdf [file 18_2020_3610_MOESM1_ESM.pdf]

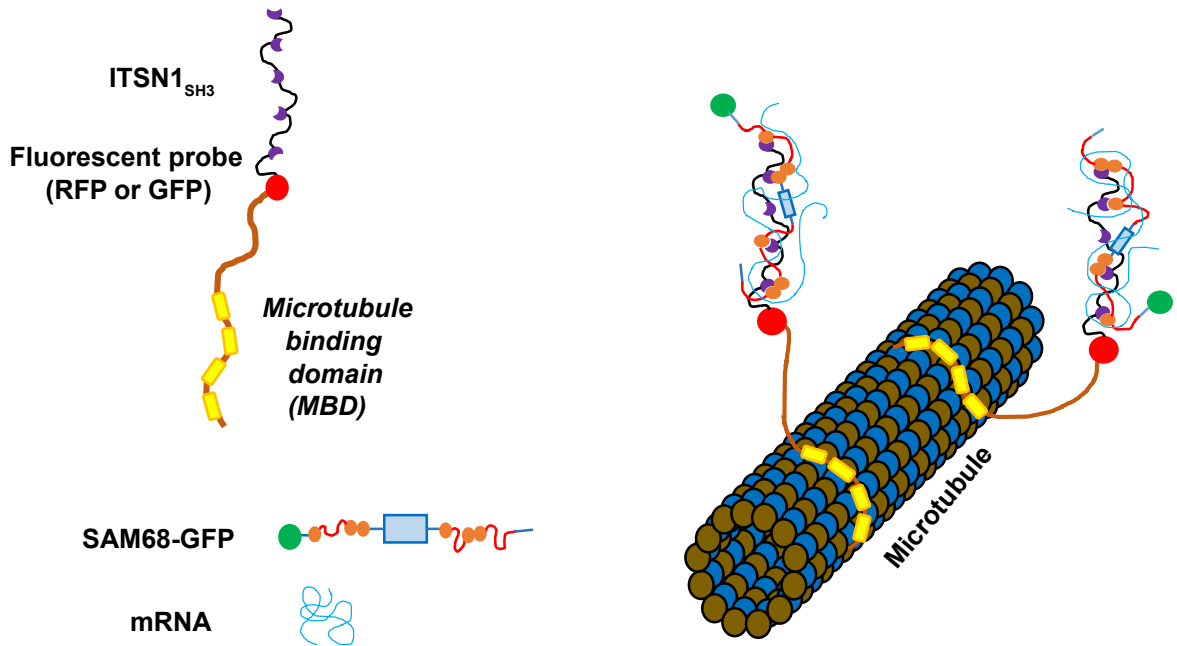

### Microtubule bench principle

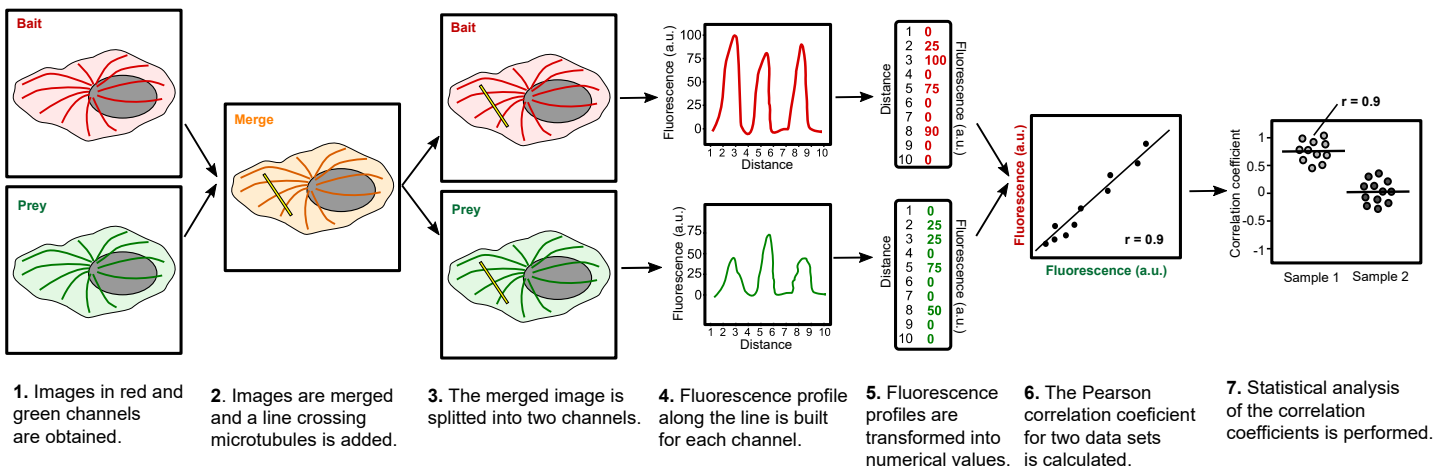

### Calculation of the correlation coefficient

## Supplementary Figure S1

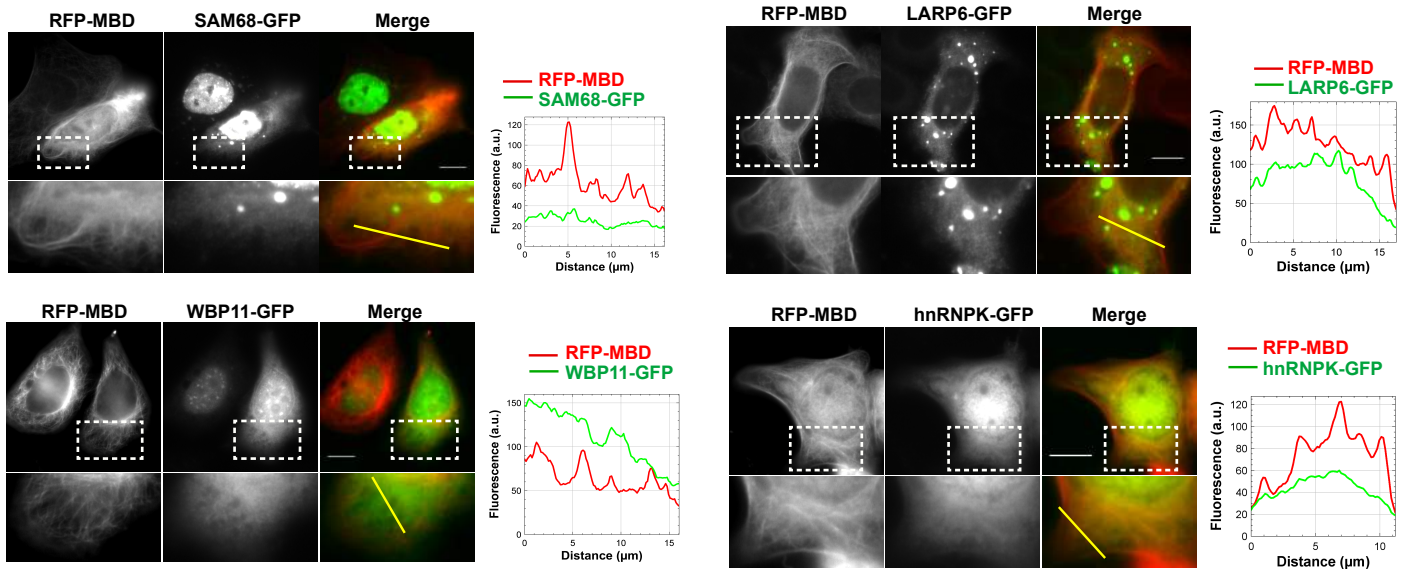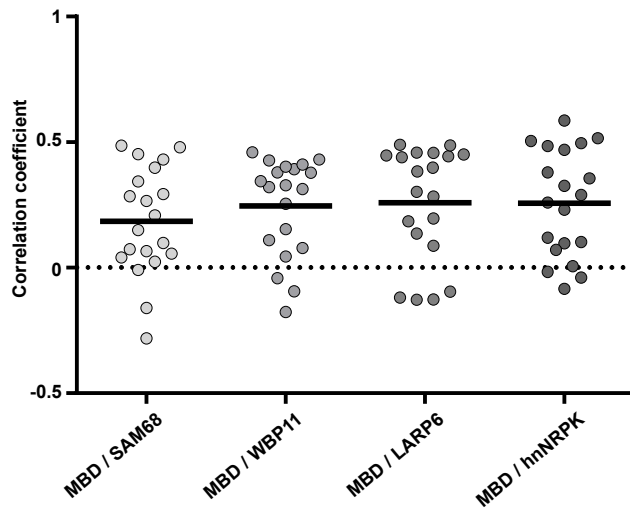

**Supplementary Figure S2**

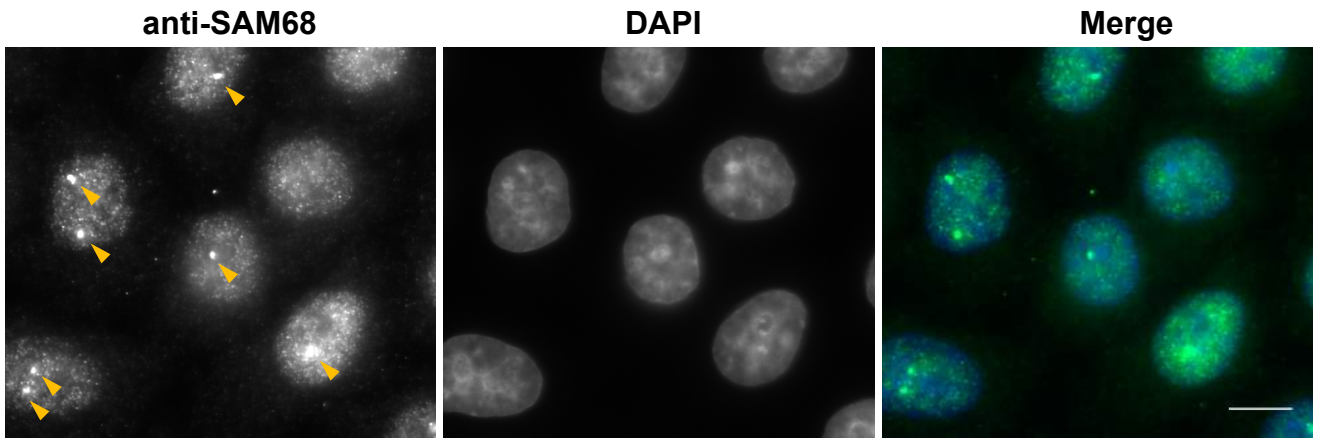

**Supplementary Figure S3**

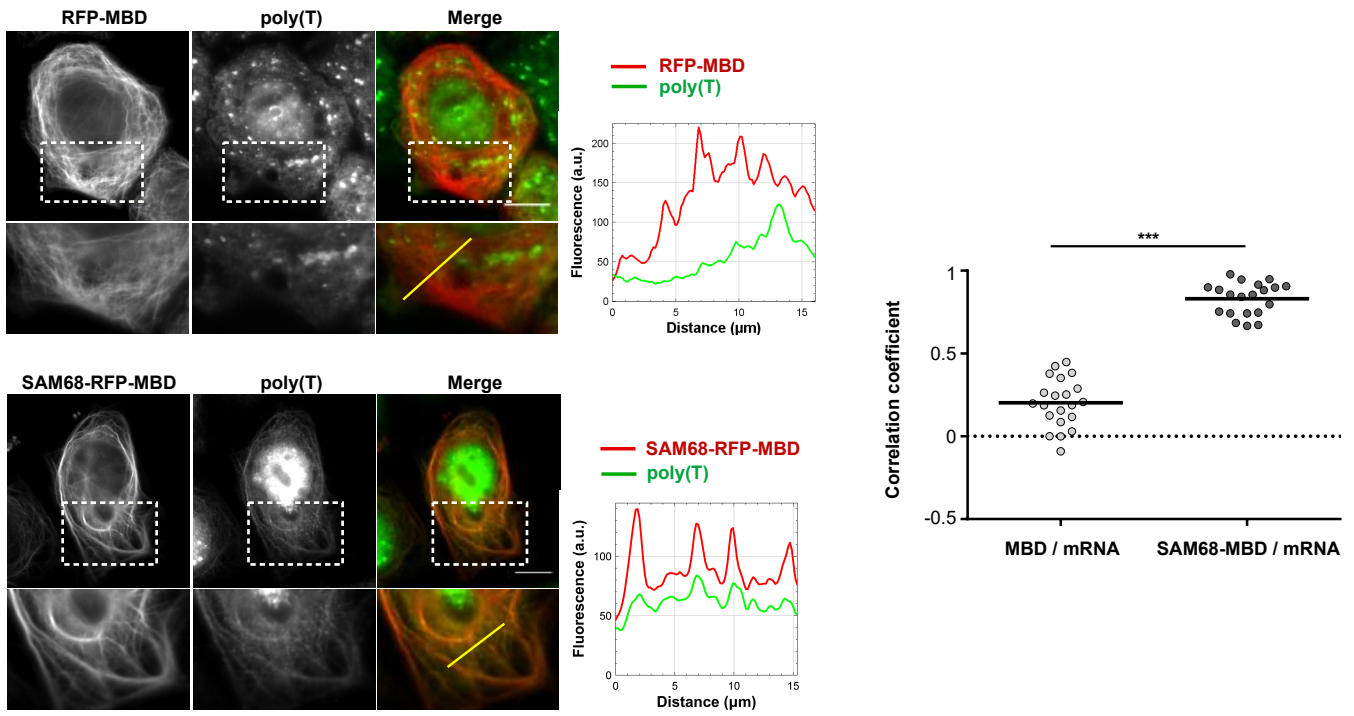

**Supplementary Figure S4**



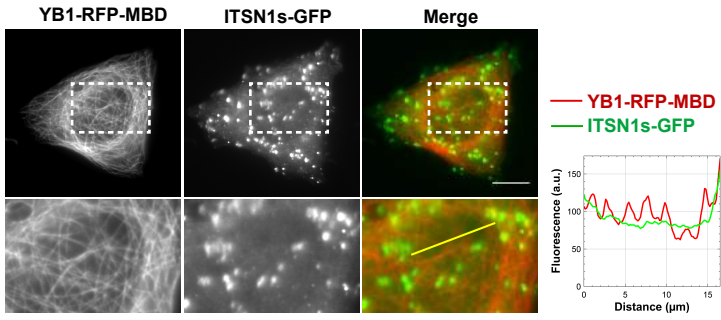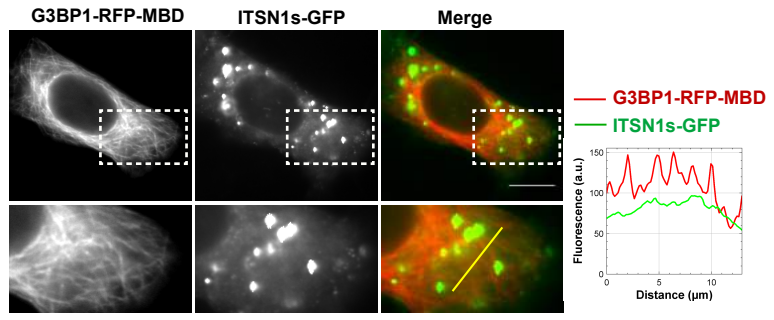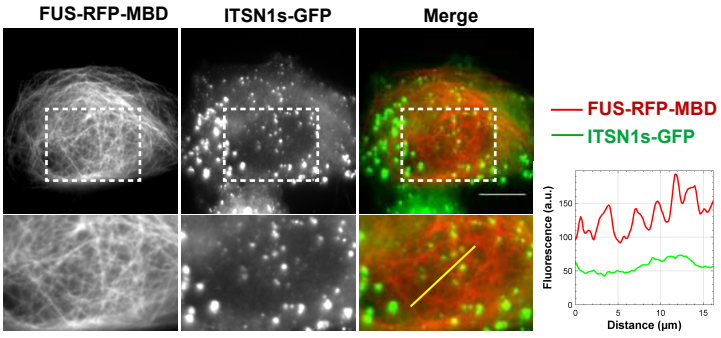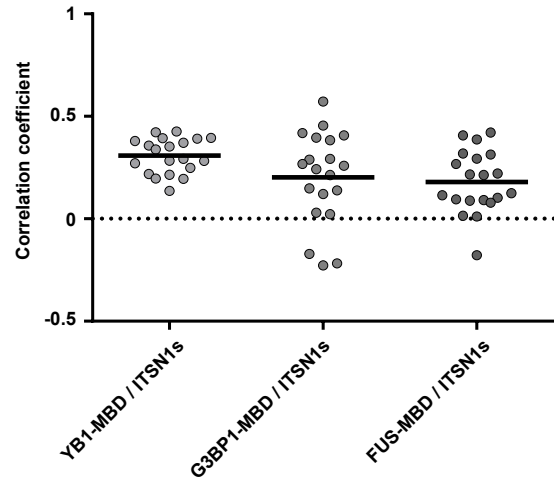

**Supplementary Figure S5**

**A**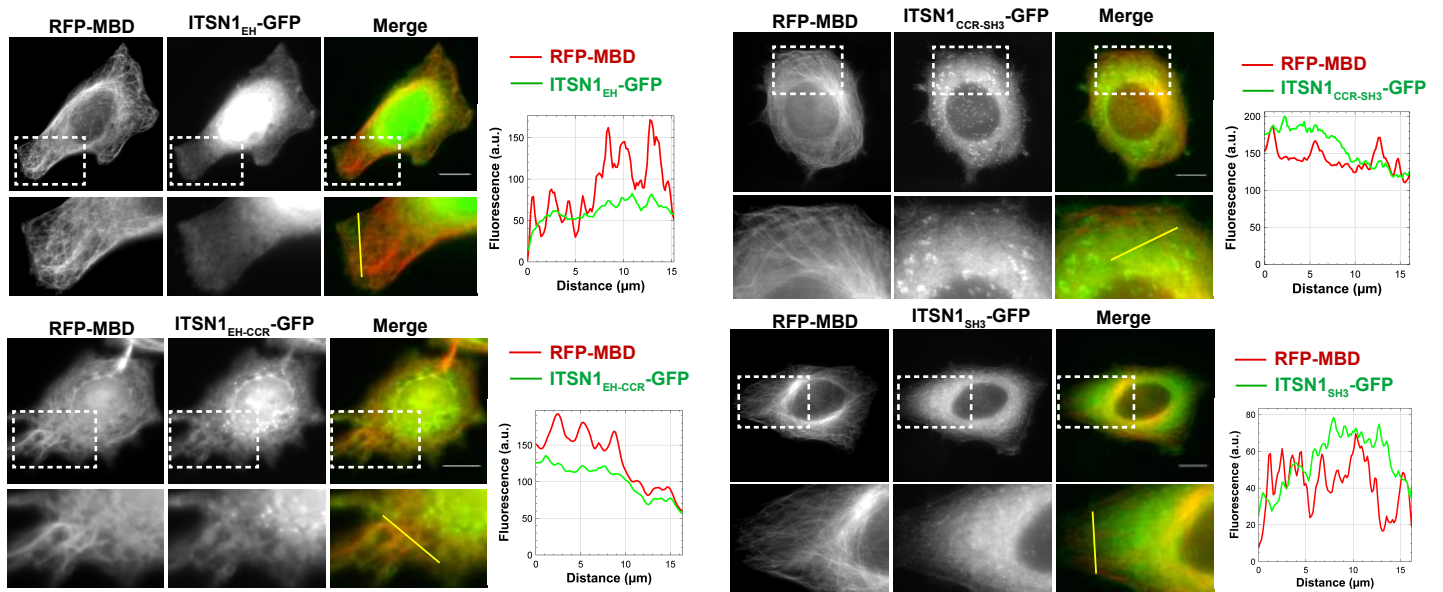**B**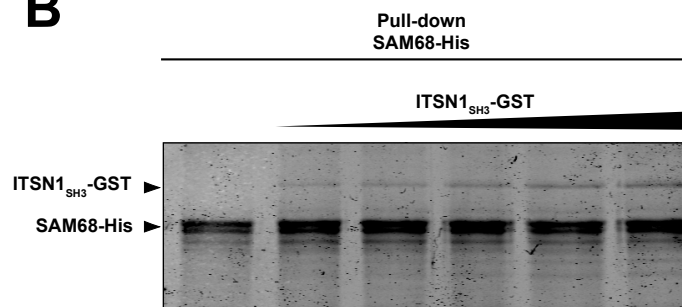**Supplementary Figure S6**

**A**

anti-ITSN1 + anti-SAM68

anti-ITSN1

anti-SAM68

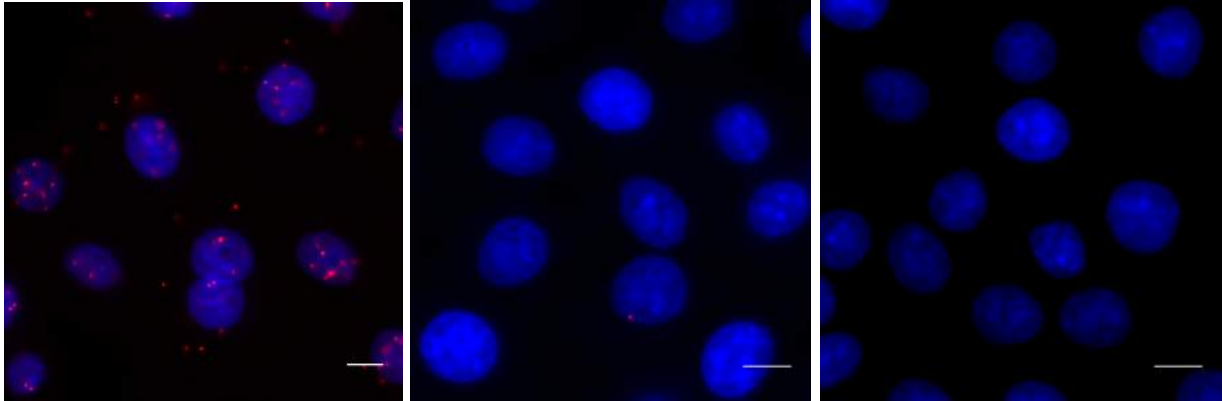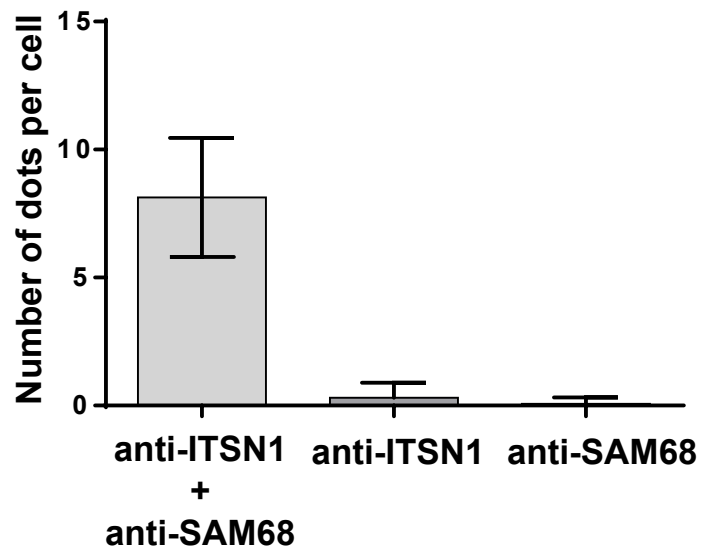**B**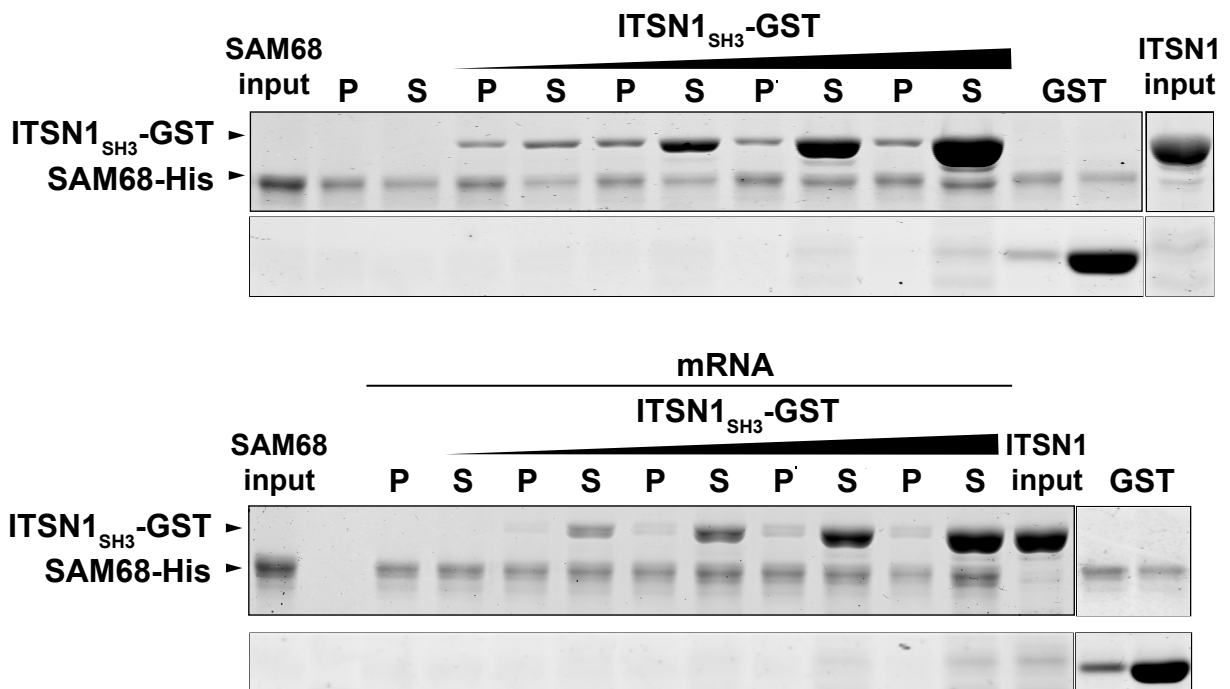**Supplementary Figure S7**

**A**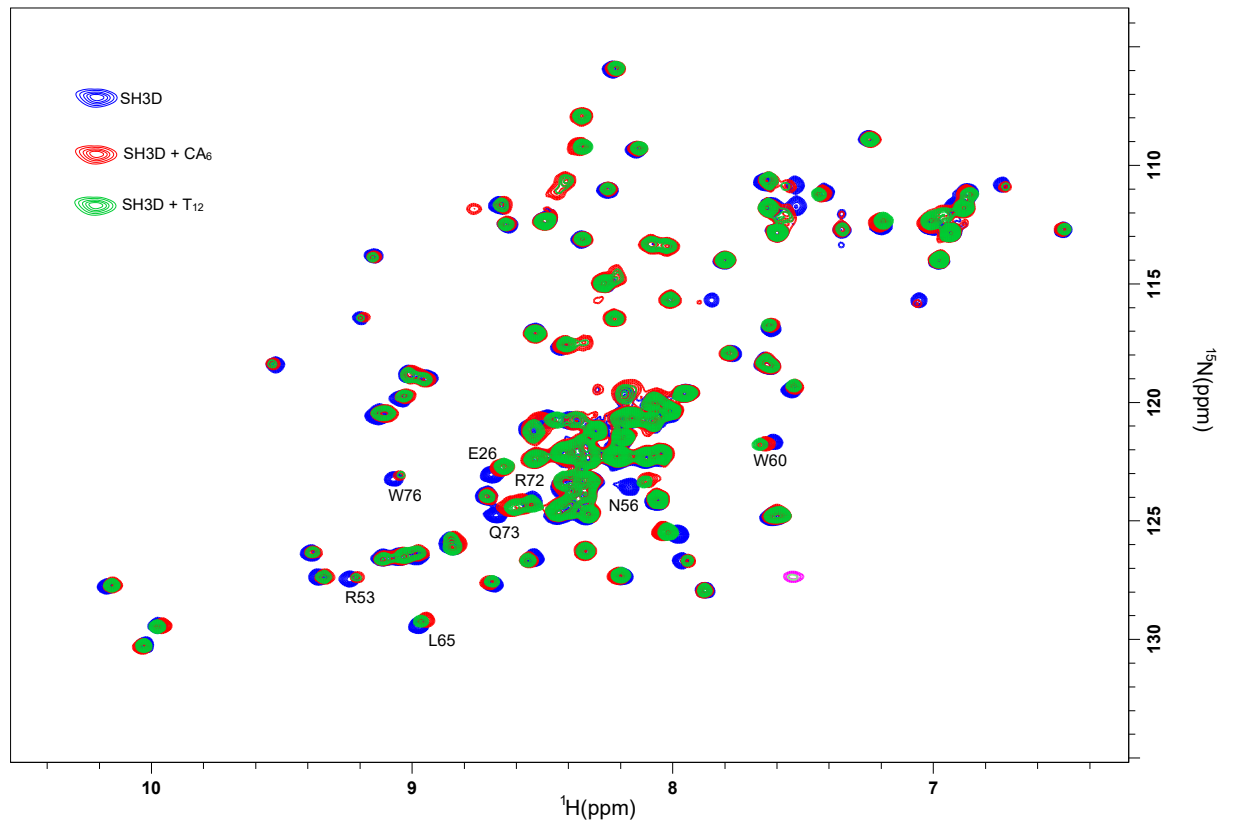**B**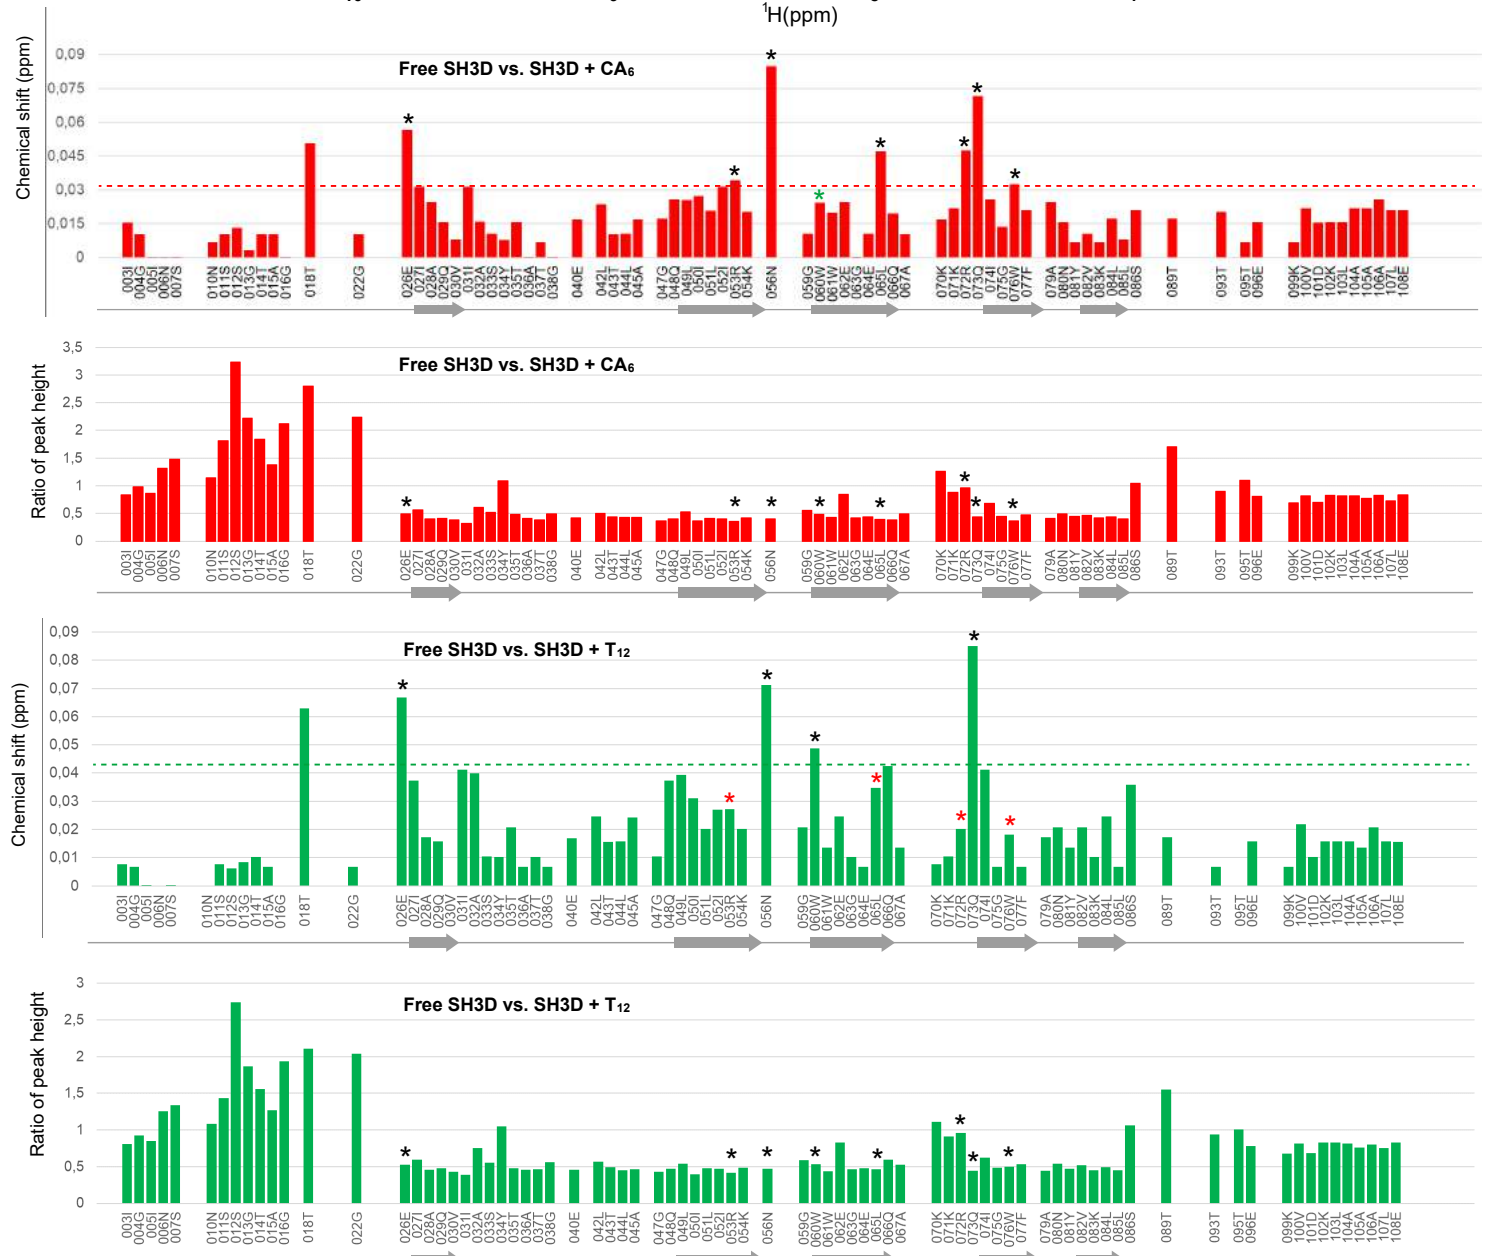**Supplementary Figure S8**

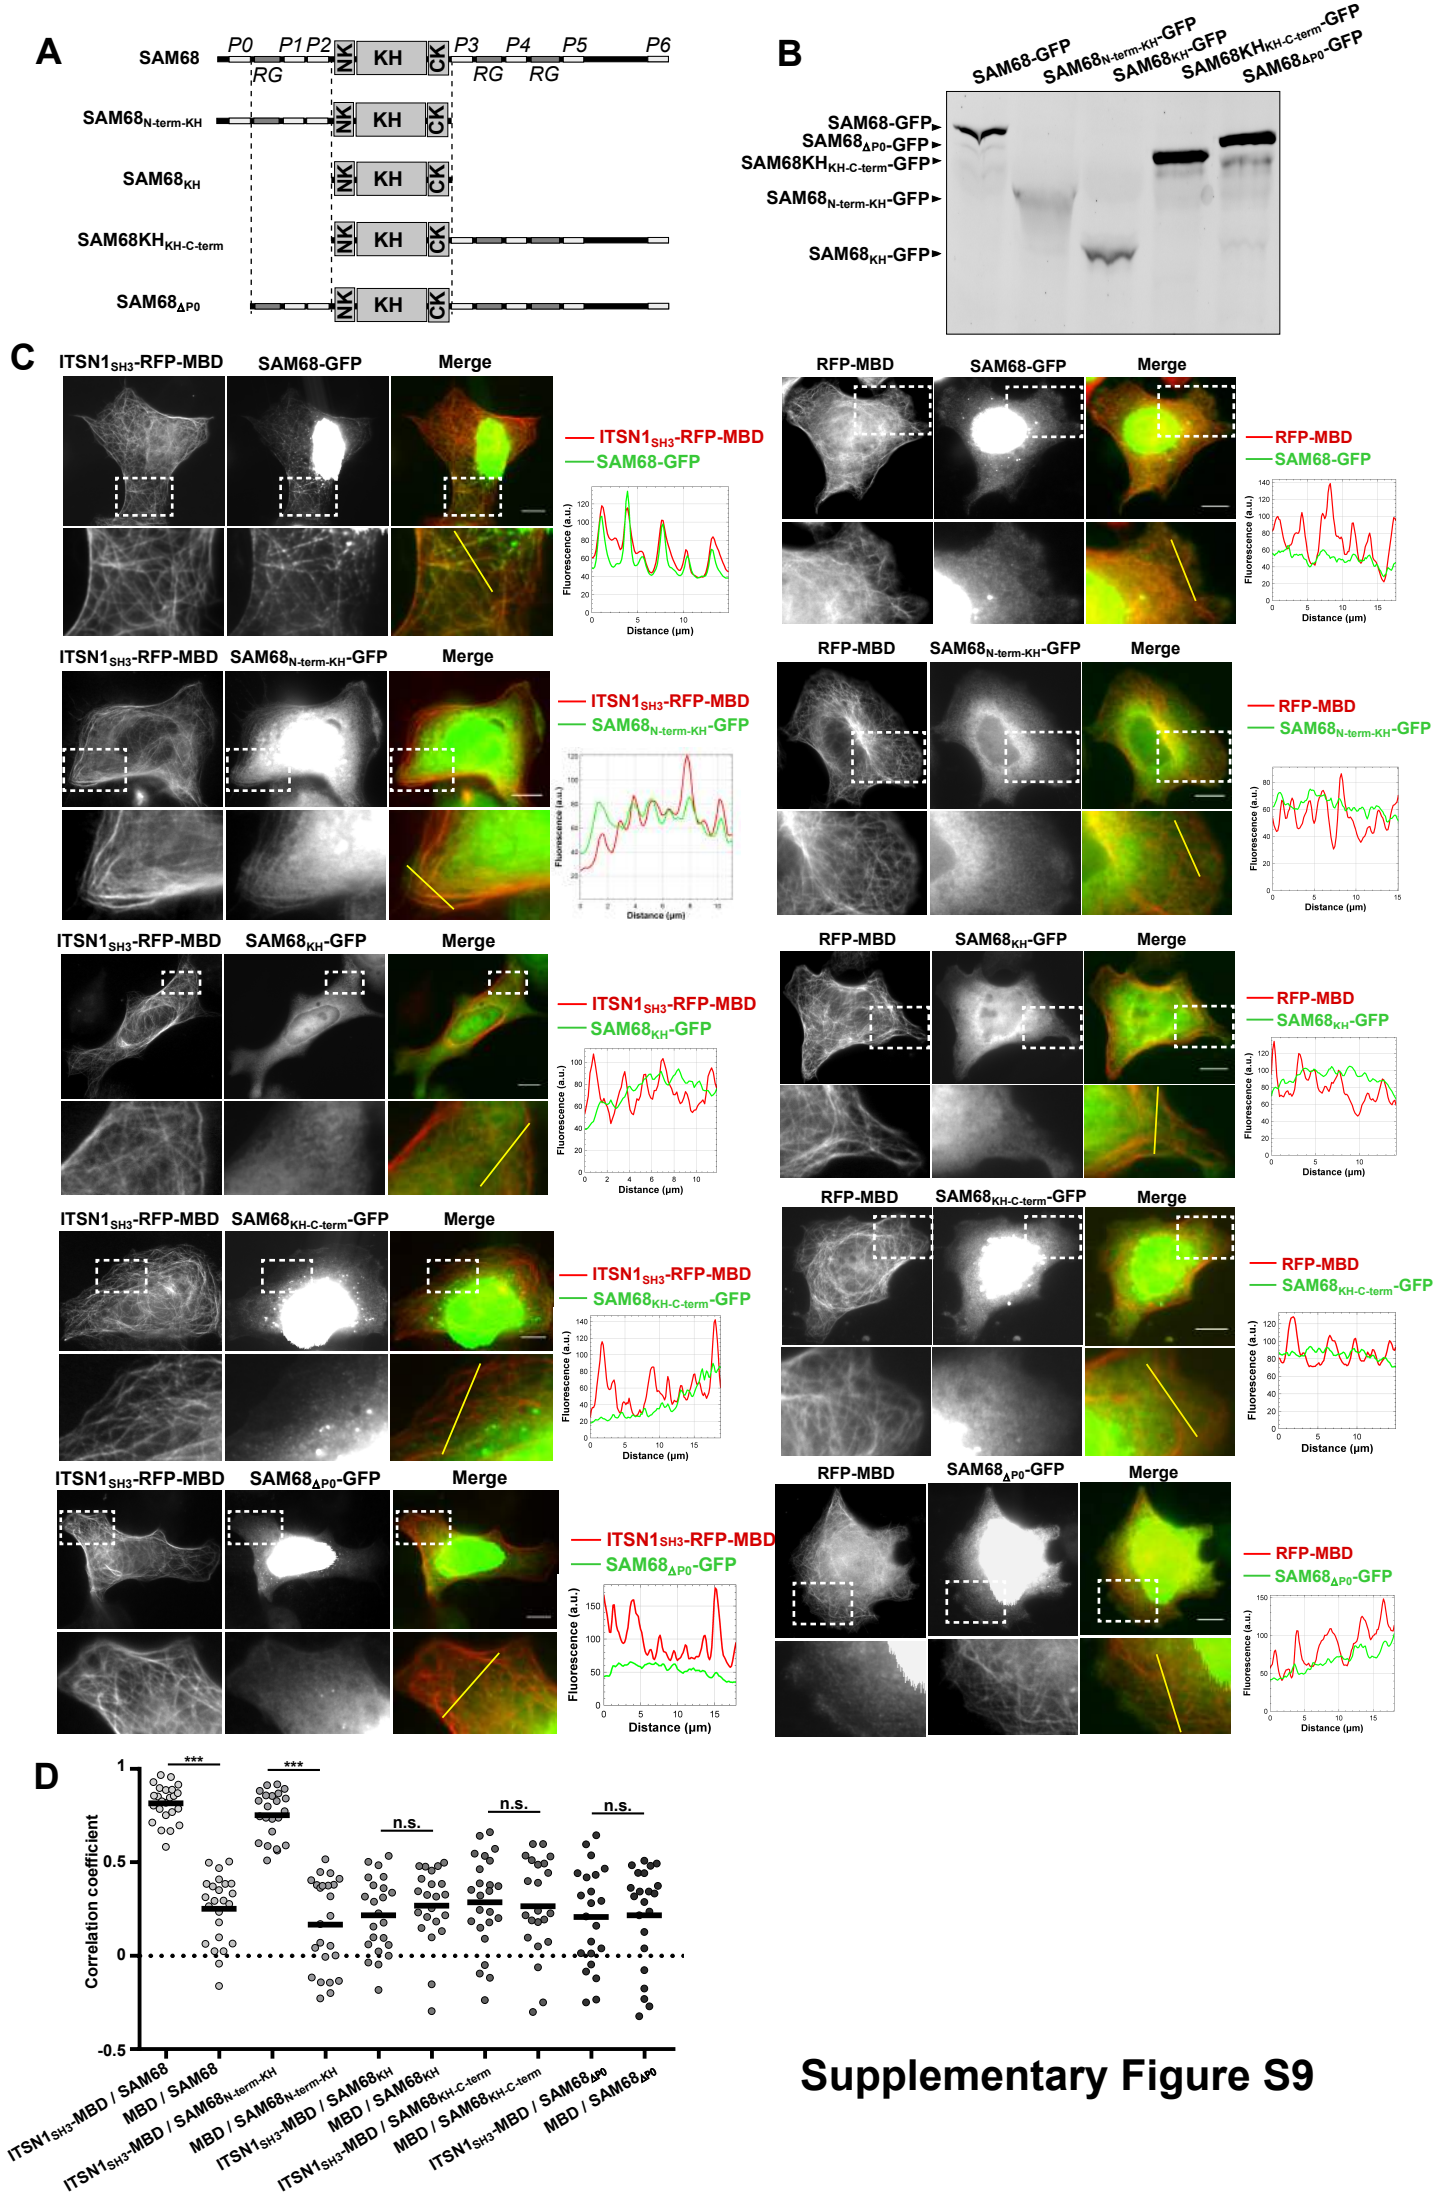



**A**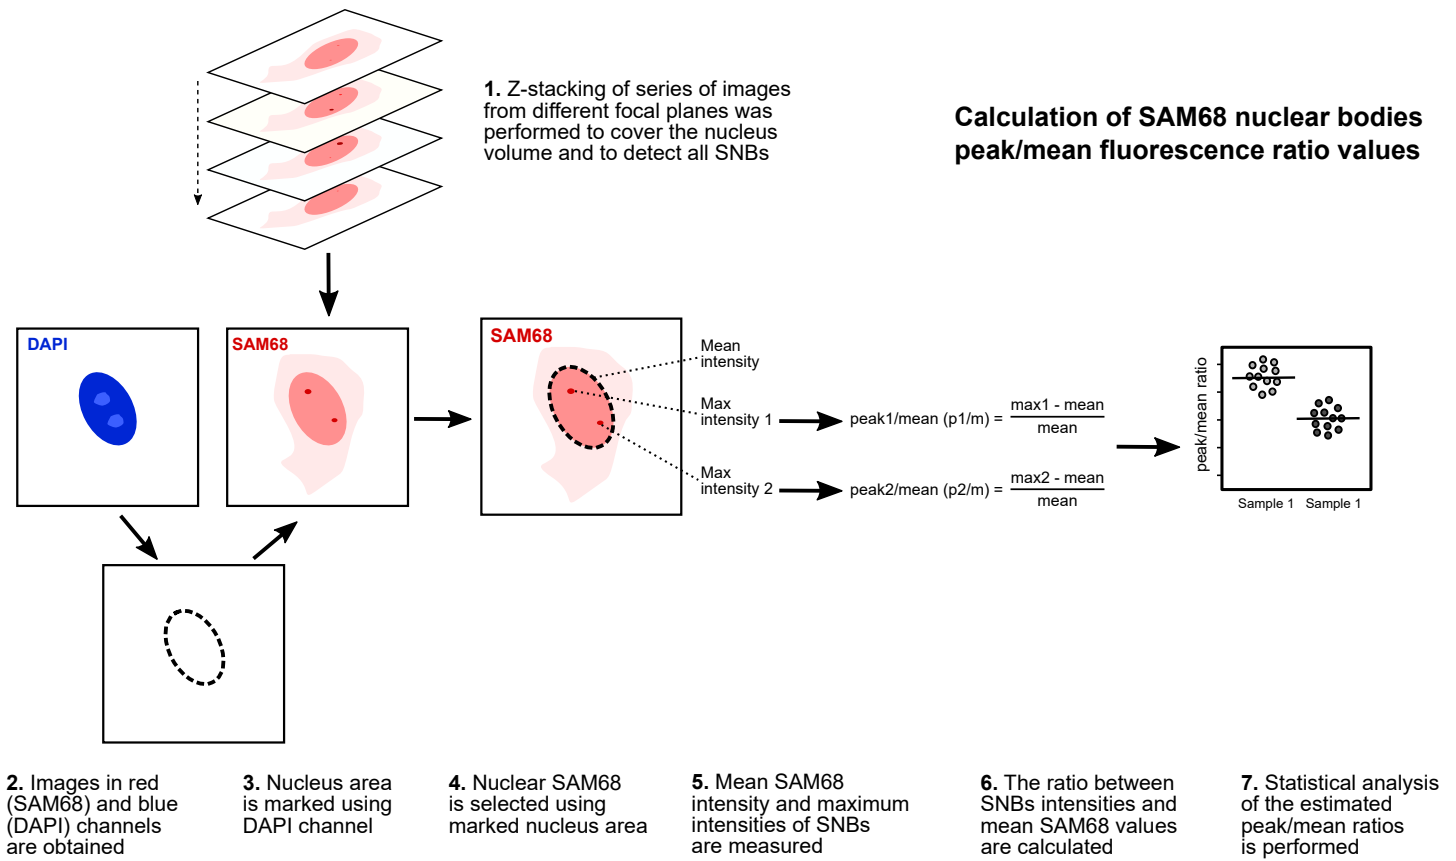**B**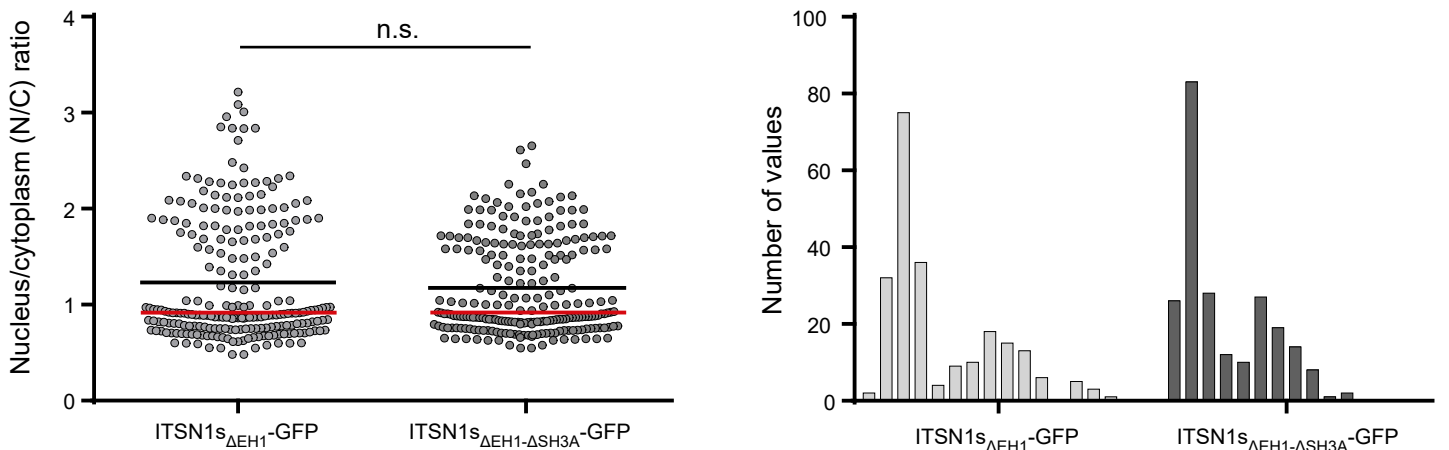

The scatter plot of variation, mean (black line), and median (red line) values of nucleus/cytoplasm (N/C) ratios for ITSN1s-GFP constructs. n.s. - non-significant.

The frequency distribution histogram of nucleus/cytoplasm (N/C) ratios for ITSN1s-GFP constructs.

**C**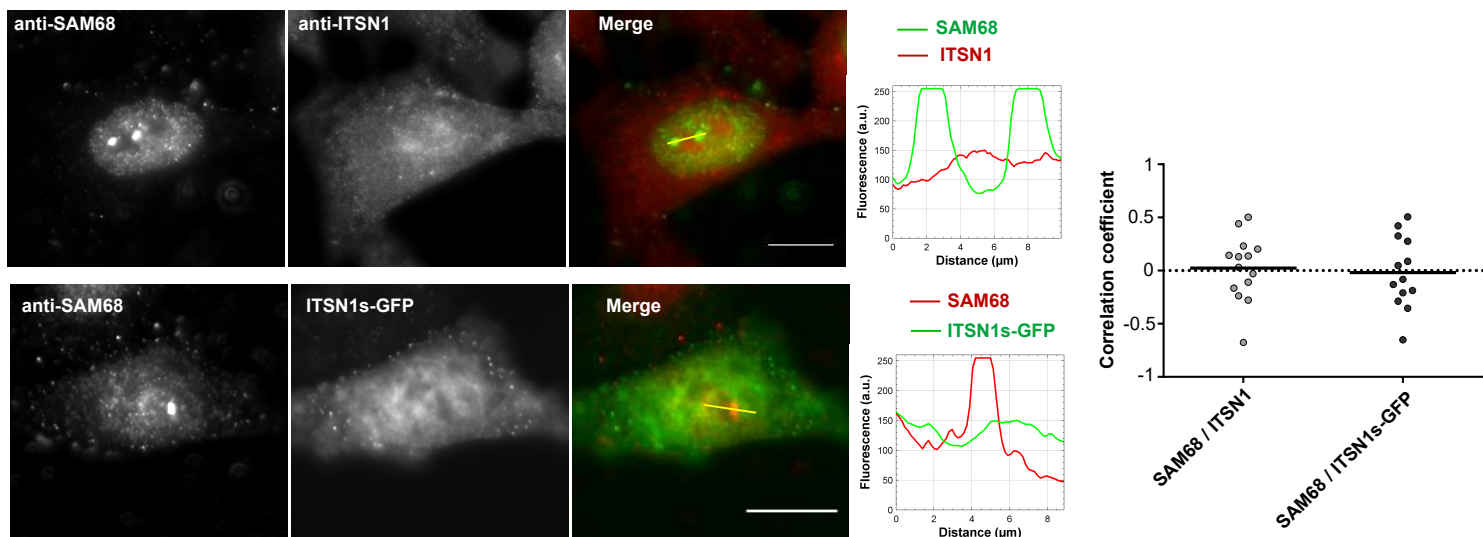

**Supplementary Figure S10**

| <b>Supplementary Table 1. The list of human proteins containing three or more SH3 domains</b> |                    |                                                |                                                        |                        |                              |                             |                                                 |
|-----------------------------------------------------------------------------------------------|--------------------|------------------------------------------------|--------------------------------------------------------|------------------------|------------------------------|-----------------------------|-------------------------------------------------|
| <b>NCBI gene ID</b>                                                                           | <b>Gene symbol</b> | <b>Full name</b>                               | <b>Other names</b>                                     | <b>NCBI protein ID</b> | <b>Number of SH3 domains</b> | <b>Nuclear localization</b> | <b>Nuclear localization evidence</b>            |
| 23268                                                                                         | DNMBP              | dynamamin binding protein                      | TUBA; CTRCT48; ARHGEF36                                | NP_056036.1            | 6                            | Found                       | Uhlen et al., 2010                              |
| 6453                                                                                          | ITSN1              | intersectin 1                                  | ITSN; SH3D1A; SH3P17                                   | NP_003015.2            | 5                            | Found                       | Alvici et al., 2018; Uhlen et al., 2010         |
| 50618                                                                                         | ITSN2              | intersectin 2                                  | SWA; SWAP; SH3D1B; SH3P18; PRO2015                     | NP_006268.2            | 5                            | Not found                   |                                                 |
| 152503                                                                                        | SH3D19             | SH3 domain containing 193                      | EBP; EVE1; Kryn; Eve-1; SH3P19                         | NP_001009555.3         | 5                            | Found                       | Uhlen et al., 2010                              |
| 9644                                                                                          | SH3PXD2A           | SH3 and PX domains 2A                          | FISH; TKS5; SH3MD1                                     | NP_055446.2            | 5                            | Not found                   |                                                 |
| 285590                                                                                        | SH3PXD2B           | SH3 and PX domains 2B                          | FTHS; HOFI; TKS4; TSK4; FAD49; KIAA1295                | NP_001017995.1         | 4                            | Found                       | Uhlen et al., 2010                              |
| 57630                                                                                         | SH3RF1             | SH3 domain containing ring finger 1            | POSH; RNF142; SH3MD2                                   | NP_065921.2            | 4                            | Not found                   |                                                 |
| 344558                                                                                        | SH3RF3             | SH3 domain containing ring finger 3            | POSH2; SH3MD4                                          | NP_001092759.1         | 4                            | Found                       | Uhlen et al., 2010                              |
| 23504                                                                                         | RIMBP2             | RIMS binding protein 2                         | RBP2; RIM-BP2; PPP1R133                                | NP_001338155.1         | 3                            | Not found                   |                                                 |
| 85376                                                                                         | RIMBP3             | RIMS binding protein 3                         | RIM-BP3; RIMBP3A; RIMBP3.1; RIM-BP3.1; RIM-BP3.A       | NP_056487.1            | 3                            | Not found                   |                                                 |
| 9256                                                                                          | TSPOAP1            | TSPO associated protein 1                      | PRAX1; BZRAP1; PBR-IP; PRAX-1; RIMBP1; RIM-BP1         | NP_004749.2            | 3                            | Not found                   |                                                 |
| 23607                                                                                         | CD2AP              | CD2 associated protein                         | CMS                                                    | NP_036252.1            | 3                            | Not found                   |                                                 |
| 4690                                                                                          | NCK1               | NCK adaptor protein 1                          | NCK; nck-1; NCKalpha                                   | NP_006144.1            | 3                            | Found                       | Lawe, Hahn, & Wong, 1997                        |
| 8440                                                                                          | NCK2               | NCK adaptor protein 2                          | GRB4; NCKbeta                                          | NP_003572.2            | 3                            | Found                       | Jahn et al., 2001                               |
| 79729                                                                                         | SH3D21             | SH3 domain containing 21                       | C1orf113                                               | NP_001156002.1         | 3                            | Found                       | Uhlen et al., 2010                              |
| 30011                                                                                         | SH3KBP1            | SH3 domain containing kinase binding protein 1 | HSB1; AGMX2; CIN85; GIG10; HSB-1; IMD61; MIG18; CD2BP3 | NP_001340821.1         | 3                            | Not found                   |                                                 |
| 153769                                                                                        | SH3RF2             | SH3 domain containing ring finger 2            | HEPP1; POSHER; RNF158; PPP1R39                         | NP_689763.4            | 3                            | Found                       | Kim et al., 2013; Uhlen et al., 2010            |
| 10580                                                                                         | SORBS1             | sorbin and SH3 domain containing 1             | CAP; FLAF2; R85FL; SH3D5; SORB1; SH3P12                | NP_001030126.1         | 3                            | Found                       | Lebre et al., 2001; Uhlen et al., 2010          |
| 8470                                                                                          | SORBS2             | sorbin and SH3 domain containing 2             | ARGBP2; PRO0618                                        | NP_001257700.1         | 3                            | Found                       | Wang, Golemis, & Kruh, 1997; Uhlen et al., 2010 |
| 10174                                                                                         | SORBS3             | sorbin and SH3 domain containing 3             | SCAM1; SH3D4; SCAM-1; vinexin                          | NP_005766.3            | 3                            | Found                       | Uhlen et al., 2010                              |

| Supplementary Table 2. The list of human RNA-binding proteins containing more than five proline motifs |             |                                             |                                                                               |                 |                          |                       |                          |                         |               |                      |
|--------------------------------------------------------------------------------------------------------|-------------|---------------------------------------------|-------------------------------------------------------------------------------|-----------------|--------------------------|-----------------------|--------------------------|-------------------------|---------------|----------------------|
| NCBI gene ID                                                                                           | Gene symbol | Full name                                   | Other names                                                                   | NCBI protein ID | RNA-binding domain       | Number of PxxP motifs | Number of RxxPxxP motifs | Number of PxxPxR motifs | Database      | Nuclear localization |
| 4940                                                                                                   | OAS3        | 2'-5'-oligoadenylate synthetase 3           | p100; p100OAS                                                                 | NP_006178.2     | 2-5-oligoadenylate_synth | 7                     | 0                        | 0                       | QuickGO       | Found                |
| 22803                                                                                                  | XRN2        | 5'-3' exoribonuclease 2                     |                                                                               | NP_001304889.1  | 5_3_exoribonuclease      | 5                     | 1                        | 0                       | QuickGO       | Found                |
| 54464                                                                                                  | XRN1        | 5'-3' exoribonuclease 1                     | SEP1                                                                          | NP_061874.3     | 5_3_exoribonuclease      | 7                     | 0                        | 0                       | QuickGO       | Not found            |
| 23536                                                                                                  | ADAT1       | adenosine deaminase tRNA specific 1         | HADAT1                                                                        | NP_036223.2     | A_deamin                 | 5                     | 0                        | 0                       | QuickGO       | Found                |
| 2058                                                                                                   | EPRS        | glutamyl-prolyl-tRNA synthetase             | EARS; PARS; QARS; QPRS; HLD15; PIG32; GLUPRORS                                | NP_004437.2     | aa-tRNA-synth            | 9                     | 0                        | 0                       | QuickGO       | Not found            |
| 54913                                                                                                  | RPP25       | ribonuclease P and MRP subunit p25          |                                                                               | NP_060263.2     | Alba                     | 6                     | 0                        | 0                       | QuickGO       | Found                |
| 9716                                                                                                   | AQR         | aquarius intron-binding spliceosomal factor | IBP160; fSAP164                                                               | NP_055506.1     | Aquarius_N               | 5                     | 0                        | 0                       | QuickGO       | Found                |
| 4076                                                                                                   | CAPRIN1     | cell cycle associated protein 1             | M11S1; GPIAP1; RNG105; GPIP137; GRIP137; p137GPI                              | NP_005889.3     | Caprin-1_C               | 6                     | 1                        | 1                       | QuickGO       | Not found            |
| 22794                                                                                                  | CASC3       | CASC3 exon junction complex subunit         | BTZ; MLN51                                                                    | NP_031385.2     | CASC3                    | 12                    | 1                        | 2                       | QuickGO       | Found                |
| 51087                                                                                                  | YBX2        | Y-box binding protein 2                     | BPC; MSY2; CSDA3; CONTRIN                                                     | NP_057066.2     | CSD                      | 8                     | 2                        | 1                       | RBPDB/AttrACT | Found                |
| 27254                                                                                                  | CSDC2       | cold shock domain containing C2             | PIPPIN; dJ347H13.2                                                            | NP_055275.1     | CSD                      | 5                     | 0                        | 0                       | RBPDB         | Found                |
| 7157                                                                                                   | TP53        | tumor protein p53                           | P53; BCC7; LFS1; BMFS5; TRP53                                                 | NP_000537.3     | CTD                      | 6                     | 0                        | 0                       | QuickGO       | Found                |
| 104                                                                                                    | ADARB1      | adenosine deaminase RNA specific B1         | RED1; ADAR2; DRABA2; DRADA2                                                   | NP_056648.1     | dsRBD                    | 5                     | 0                        | 0                       | QuickGO       | Found                |
| 3609                                                                                                   | ILF3        | interleukin enhancer binding factor 3       | CBTF; DRBF; MMP4; MPP4; NF90; NFAR; NF110; NF90a; NF90b; NF90c; NFAR2; TCP80; | NP_060090.2     | dsRBD                    | 5                     | 0                        | 0                       | QuickGO       | Found                |



|            |        |                                                |                                                                                                                  |                    |              |    |   |   |                 |           |
|------------|--------|------------------------------------------------|------------------------------------------------------------------------------------------------------------------|--------------------|--------------|----|---|---|-----------------|-----------|
|            |        |                                                | DRBP76; NF110b;<br>NFAR-1; NFAR-2;<br>NFAR90; TCP110;<br>MPP4110; NF90ctv;<br>NFAR110;<br>MPHOSPH4; NF-AT-<br>90 |                    |              |    |   |   |                 |           |
| 6780       | STAU1  | stau1 double-stranded<br>RNA binding protein 1 | STAU; PPP1R150                                                                                                   | NP_00130606<br>4.1 | dsRBD        | 6  | 0 | 0 | QuickGO         | Not found |
| 23405      | DICER1 | dicer 1, ribonuclease III                      | DCR1; GLOW;<br>MNG1; Dicer;<br>HERNA; RMSE2;<br>Dicer1e; K12H4.8-<br>LIKE                                        | NP_085124.2        | dsRBD; PAZ   | 9  | 0 | 1 | QuickGO         | Not found |
| 54487      | DGCR8  | DGCR8 microprocessor<br>complex subunit        | Gy1; pasha;<br>DGCRK6; C22orf12                                                                                  | NP_073557.3        | dsRBDx2      | 7  | 0 | 0 | QuickGO         | Found     |
| 27067      | STAU2  | stau1 double-stranded<br>RNA binding protein 2 | 39K2; 39K3                                                                                                       | NP_00115785<br>2.1 | dsRBDx4      | 5  | 0 | 0 | QuickGO         | Found     |
| 6651       | SON    | SON DNA binding protein                        | SON3; BASS1; DBP-<br>5; NREBP; TOKIMS;<br>C21orf50                                                               | NP_620305.2        | DSRM         | 36 | 0 | 0 | QuickGO         | Found     |
| 103        | ADAR   | adenosine deaminase RNA<br>specific            | DSH; AGS6; G1P1;<br>IFI4; P136; ADAR1;<br>DRADA; DSRAD; IFI-<br>4; K88DSRBP                                      | NP_001102.3        | DSRM; ADEAMc | 6  | 0 | 0 | AttrACT/QuickGO | Found     |
| 1660       | DHX9   | DExH-box helicase 9                            | LKP; RHA; DDX9;<br>NDH2; NDHII                                                                                   | NP_001348.2        | DSRM; HrpA   | 5  | 0 | 0 | AttrACT/QuickGO | Found     |
| 23293      | SMG6   | SMG6 nonsense mediated<br>mRNA decay factor    | EST1A; SMG-6;<br>C17orf31;<br>hSMG5/7a                                                                           | NP_060045.4        | EST1; PIN    | 8  | 0 | 0 | QuickGO         | Found     |
| 26065      | LSM14A | LSM14A mRNA processing<br>body assembly factor | RAP55; FAM61A;<br>RAP55A; C19orf13                                                                               | NP_00110756<br>5.1 | FDF          | 6  | 0 | 2 | QuickGO         | Not found |
| 92345      | NAF1   | nuclear assembly factor 1<br>ribonucleoprotein |                                                                                                                  | NP_612395.2        | Gar1/Naf1    | 10 | 1 | 0 | QuickGO         | Found     |
| 31778<br>1 | DDX51  | DEAD-box helicase 51                           |                                                                                                                  | NP_778236.2        | Helicase     | 9  | 0 | 0 | QuickGO         | Found     |
| 9704       | DHX34  | DExH-box helicase 34                           | HRH1; DDX34                                                                                                      | NP_055496.2        | Helicase     | 9  | 2 | 0 | QuickGO         | Found     |
| 11325      | DDX42  | DEAD-box helicase 42                           | RHELP; RNAHP;<br>SF3B8; DDX42P;<br>SF3b125                                                                       | NP_031398.2        | Helicase     | 8  | 0 | 1 | QuickGO         | Found     |

|            |         |                                                                          |                                                                                      |                    |                |    |   |   |                           |           |
|------------|---------|--------------------------------------------------------------------------|--------------------------------------------------------------------------------------|--------------------|----------------|----|---|---|---------------------------|-----------|
| 79039      | DDX54   | DEAD-box helicase 54                                                     | DP97                                                                                 | NP_00110479<br>2.1 | Helicase       | 6  | 1 | 0 | QuickGO                   | Found     |
| 64794      | DDX31   | DEAD-box helicase 31                                                     | PPP1R25                                                                              | NP_073616.6        | Helicase       | 5  | 1 | 0 | QuickGO                   | Found     |
| 9785       | DHX38   | DEAH-box helicase 38                                                     | RP84; DDX38;<br>PRP16; PRPF16                                                        | NP_054722.2        | Helicase       | 5  | 1 | 1 | QuickGO                   | Found     |
| 22907      | DHX30   | DExH-box helicase 30                                                     | DDX30; RETCOR;<br>NEDMIAL                                                            | NP_619520.1        | Helicase       | 5  | 1 | 1 | QuickGO                   | Not found |
| 6832       | SUPV3L1 | Suv3 like RNA helicase                                                   | SUV3                                                                                 | NP_003162.2        | Helicase; SUV3 | 5  | 0 | 1 | AttrACT/QuickGO           | Found     |
| 26057      | ANKRD17 | ankyrin repeat domain 17                                                 | GTAR; MASK2; NY-<br>BR-16                                                            | NP_115593.3        | KH             | 20 | 0 | 1 | RBPDB/QuickGO             | Found     |
| 22889      | KHDC4   | KH domain containing 4,<br>pre-mRNA splicing factor                      | BLOM7; KIAA0907;<br>SNORA80EHG                                                       | NP_055764.2        | KH             | 12 | 0 | 0 | QuickGO                   | Found     |
| 10657      | KHDRBS1 | KH RNA binding domain<br>containing, signal<br>transduction associated 1 | p62; p68; Sam68                                                                      | NP_006550.1        | KH             | 8  | 1 | 1 | RBPDB/AttrACT/Quick<br>GO | Found     |
| 54882      | ANKHD1  | ankyrin repeat and KH<br>domain containing 1                             | MASK; MASK1;<br>VBARP; PP2500                                                        | NP_060217.1        | KH             | 14 | 0 | 1 | RBPDB/AttrACT/Quick<br>GO | Not found |
| 8165       | AKAP1   | A-kinase anchoring<br>protein 1                                          | AKAP; PRKA1;<br>AKAP84; TDRD17;<br>AKAP121; AKAP149;<br>D-AKAP1; PPP1R43;<br>SAKAP84 | NP_003479.1        | KH             | 8  | 0 | 0 | RBPDB/AttrACT/Quick<br>GO | Not found |
| 20255<br>9 | KHDRBS2 | KH RNA binding domain<br>containing, signal<br>transduction associated 2 | SLM1; SLM-1                                                                          | NP_00133755<br>1.1 | KH             | 5  | 2 | 2 | RBPDB/AttrACT             | Not found |
| 7536       | SF1     | splicing factor 1                                                        | BBP; MBBP; ZFM1;<br>ZNF162; D11S636;<br>ZCCHC25                                      | NP_004621.2        | KH; Znf_CCHC   | 24 | 0 | 0 | RBPDB/AttrACT/Quick<br>GO | Found     |
| 9513       | FXR2    | FMR1 autosomal homolog<br>2                                              | FXR2P; FMR1L2                                                                        | NP_004851.2        | KHx2           | 6  | 2 | 0 | RBPDB/AttrACT/Quick<br>GO | Not found |
| 92312      | MEX3A   | mex-3 RNA binding family<br>member A                                     | RKHD4; MEX-3A;<br>RNF162                                                             | NP_00108719<br>4.1 | KHx2; Znf_CCCH | 11 | 2 | 0 | RBPDB/QuickGO             | Not found |
| 39966<br>4 | MEX3D   | mex-3 RNA binding family<br>member D                                     | MEX3; TINO;<br>RKHD1; MEX-3D;<br>RNF193; OK/SW-<br>cl.4                              | NP_976049.3        | KHx2; Znf_RING | 15 | 2 | 1 | RBPDB/QuickGO             | Found     |
| 84206      | MEX3B   | mex-3 RNA binding family<br>member B                                     | RKHD3; MEX-3B;<br>RNF195                                                             | NP_115622.2        | KHx2; Znf_RING | 6  | 0 | 0 | RBPDB/QuickGO             | Found     |
| 51320      | MEX3C   | mex-3 RNA binding family<br>member C                                     | RKHD2; BM-013;<br>MEX-3C; RNF194                                                     | NP_057710.3        | KHx2; Znf_RING | 13 | 2 | 1 | RBPDB/QuickGO             | Not found |

|        |        |                                                       |                                                            |                |             |    |   |   |                       |           |
|--------|--------|-------------------------------------------------------|------------------------------------------------------------|----------------|-------------|----|---|---|-----------------------|-----------|
| 3190   | HNRNPK | heterogeneous nuclear ribonucleoprotein K             | AUKS; CSBP; TUNP; HNRPK                                    | NP_002131.2    | KHx3        | 5  | 3 | 3 | RBPDB/AttRACT/QuickGO | Found     |
| 80114  | BICC1  | BicC family RNA binding protein 1                     | BICC; CYSRD                                                | NP_001073981.1 | KHx3; SAM   | 5  | 0 | 0 | RBPDB/QuickGO         | Found     |
| 8570   | KHSRP  | KH-type splicing regulatory protein                   | p75; FBP2; KSRP; FUBP2                                     | NP_003676.2    | KHx4        | 18 | 1 | 0 | RBPDB/AttRACT/QuickGO | Found     |
| 8880   | FUBP1  | far upstream element binding protein 1                | FBP; FUBP; hDH V                                           | NP_001290362.1 | KHx4        | 14 | 0 | 0 | RBPDB/QuickGO         | Found     |
| 23367  | LARP1  | La ribonucleoprotein domain family member 1           | LARP                                                       | NP_056130.2    | La          | 15 | 1 | 1 | RBPDB/QuickGO         | Found     |
| 55132  | LARP1B | La ribonucleoprotein domain family member 1B          | LARP2                                                      | NP_060548.2    | La          | 7  | 0 | 1 | RBPDB/QuickGO         | Found     |
| 23185  | LARP4B | La ribonucleoprotein domain family member 4B          | LARP5; KIAA0217                                            | NP_001338206.1 | La; RRM     | 8  | 0 | 0 | RBPDB/QuickGO         | Not found |
| 113251 | LARP4  | La ribonucleoprotein domain family member 4           | PP13296                                                    | NP_055970.1    | La; RRM     | 5  | 0 | 0 | RBPDB/QuickGO         | Not found |
| 6628   | SNRPB  | small nuclear ribonucleoprotein polypeptides B and B1 | COD; CCMS; SNRPB1; SmB/B'; Sm-B/B'; snRNP-B; SmB/SmB'      | NP_937859.1    | LSm         | 6  | 1 | 0 | RBPDB/QuickGO         | Found     |
| 6638   | SNRPN  | small nuclear ribonucleoprotein polypeptide N         | SMN; PWCR; SM-D; sm-N; RT-LI; HCERN3; SNRNP-N; SNURF-SNRPN | NP_003088.1    | LSm         | 6  | 1 | 0 | RBPDB                 | Found     |
| 134353 | LSM11  | LSM11, U7 small nuclear RNA associated                |                                                            | NP_775762.1    | LSm         | 5  | 1 | 0 | RBPDB/QuickGO         | Found     |
| 4686   | NCBP1  | nuclear cap binding protein subunit 1                 | NCBP; Sto1; CBP80                                          | NP_001338433.1 | MIF4G-like  | 5  | 0 | 0 | QuickGO               | Found     |
| 190    | NROB1  | nuclear receptor subfamily 0 group B member 1         | AHC; AHX; DSS; GTD; HHG; AHCH; DA; DAX-1; NROB1; SRXY      | NP_000466.2    | NR_Repeatx4 | 5  | 1 | 0 | QuickGO               | Found     |
| 65083  | NOL6   | nucleolar protein 6                                   | NRAP; UTP22; bA311H10.1                                    | NP_075068.2    | Nrap        | 9  | 1 | 1 | QuickGO               | Found     |
| 219988 | PATL1  | PAT1 homolog 1, processing body mRNA decay factor     | Pat1b; hPat1b                                              | NP_689929.2    | Pat-C       | 7  | 0 | 1 | QuickGO               | Found     |
| 55124  | PIWIL2 | piwi like RNA-mediated gene silencing 2               | CT80; HILI; mili; PIWIL1L                                  | NP_001129193.1 | PAZ         | 6  | 0 | 0 | QuickGO               | Found     |
| 23381  | SMG5   | SMG5 nonsense mediated mRNA decay factor              | EST1B; SMG-5; LPTS-RP1                                     | NP_056142.2    | PIN         | 6  | 0 | 0 | QuickGO               | Found     |

|         |         |                                                            |                                                                 |                 |              |    |   |   |                       |           |
|---------|---------|------------------------------------------------------------|-----------------------------------------------------------------|-----------------|--------------|----|---|---|-----------------------|-----------|
| 9698    | PUM1    | pumilio RNA binding family member 1                        | PUMH; HSPUM; PUMH1; PUML1; SCA47                                | NP_00101849 4.1 | PUM          | 6  | 0 | 0 | RBPDB/AttRACT/QuickGO | Found     |
| 10250   | SRRM1   | serine and arginine repetitive matrix 1                    | 160-KD; POP101; SRM160                                          | NP_00129037 7.1 | PWI          | 16 | 8 | 4 | RBPDB/QuickGO         | Found     |
| 3508    | IGHMBP2 | immunoglobulin mu DNA binding protein 2                    | HCSA; HMN6; CATF1; CMT2S; SMARD1; SMUBP2; ZFAND7                | NP_002171.2     | R3H; Znf_AN1 | 5  | 0 | 0 | AttRACT/QuickGO       | Found     |
| 29102   | DROSHA  | drosha ribonuclease III                                    | RN3; ETOH12; RNASEN; RANSE3L; RNASE3L; HSA242976                | NP_037367.3     | RIBOc; Rnc   | 24 | 1 | 1 | QuickGO               | Found     |
| 60528   | ELAC2   | elaC ribonuclease Z 2                                      | ELC2; HPC2; COXPD17                                             | NP_060597.4     | RibonucZ     | 5  | 0 | 0 | QuickGO               | Found     |
| 5442    | POLRMT  | RNA polymerase mitochondrial                               | APOLMT; MTRNAP; MTRPOL; h-mtRPOL                                | NP_005026.3     | RNA_POL      | 10 | 2 | 0 | QuickGO               | Not found |
| 5430    | POLR2A  | RNA polymerase II subunit A                                | POLR2, POLRA, RPB1, RPBh1, RPO2, RPOL2, RpIILS, hRPB220, hsRPB1 | NP_000928.1     | RNAP_II_Rpb1 | 57 | 1 | 0 | QuickGO               | Found     |
| 23067   | SETD1B  | SET domain containing 1B, histone lysine methyltransferase | KMT2G; Set1B                                                    | NP_00134027 4.1 | RRM          | 63 | 3 | 4 | RBPDB                 | Found     |
| 56252   | YLPM1   | YLP motif containing 1                                     | ZAP3; ZAP113; PPP1R169; C14orf170                               | NP_062535.2     | RRM          | 59 | 2 | 0 | QuickGO               | Found     |
| 15543 5 | RBM33   | RNA binding motif protein 33                               | PRR8                                                            | NP_444271.2     | RRM          | 40 | 3 | 1 | RBPDB/QuickGO         | Found     |
| 23082   | PPRC1   | PPARG related coactivator 1                                | PRC                                                             | NP_055877.3     | RRM          | 38 | 2 | 1 | RBPDB/AttRACT/QuickGO | Found     |
| 9739    | SETD1A  | SET domain containing 1A, histone lysine methyltransferase | Set1; KMT2F; Set1A                                              | NP_055527.1     | RRM          | 33 | 3 | 4 | RBPDB                 | Found     |
| 57466   | SCAF4   | SR-related CTD associated factor 4                         | SRA4; SFRS15                                                    | NP_065757.1     | RRM          | 30 | 1 | 1 | QuickGO               | Found     |
| 23112   | TNRC6B  | trinucleotide repeat containing adaptor 6B                 |                                                                 | NP_00115597 3.1 | RRM          | 21 | 1 | 0 | QuickGO               | Found     |
| 4288    | MKI67   | marker of proliferation Ki-67                              | KIA; MIB-; MIB-1; PPP1R105                                      | NP_002408.3     | RRM          | 20 | 5 | 1 | QuickGO               | Found     |

|            |              |                                                                   |                                          |                 |     |    |   |   |                       |           |
|------------|--------------|-------------------------------------------------------------------|------------------------------------------|-----------------|-----|----|---|---|-----------------------|-----------|
| 11052      | CPSF6        | cleavage and polyadenylation specific factor 6                    | CFIM; CFIM68; CFIM72; HPBRII-4; HPBRII-7 | NP_00128787 6.1 | RRM | 19 | 0 | 0 | RBPDB/QuickGO         | Found     |
| 13352<br>2 | PPARGC1<br>B | PPARG coactivator 1 beta                                          | PERC; ERRL1; PGC1B; PGC-1(beta)          | NP_573570.3     | RRM | 14 | 2 | 1 | RBPDB                 | Found     |
| 79171      | RBM42        | RNA binding motif protein 42                                      |                                          | NP_077297.2     | RRM | 14 | 1 | 0 | RBPDB/AttRACT/QuickGO | Found     |
| 8888       | MCM3AP       | minichromosome maintenance complex component 3 associated protein | GANP; SAC3; MAP80; PNRIID                | NP_003897.2     | RRM | 12 | 1 | 0 | RBPDB                 | Found     |
| 51593      | SRRT         | serrate, RNA effector molecule                                    | ARS2; ASR2; serrate                      | NP_056992.4     | RRM | 12 | 0 | 1 | RBPDB/QuickGO         | Found     |
| 22985      | ACIN1        | apoptotic chromatin condensation inducer 1                        | ACN; ACINUS; fSAP152                     | NP_055792.1     | RRM | 11 | 1 | 0 | RBPDB/QuickGO         | Found     |
| 27327      | TNRC6A       | trinucleotide repeat containing adaptor 6A                        | GW1; FAME6; GW182; TNRC6; CAGH26         | NP_055309.2     | RRM | 10 | 0 | 0 | RBPDB/QuickGO         | Found     |
| 23283      | CSTF2T       | cleavage stimulation factor subunit 2 tau variant                 | CstF-64T                                 | NP_056050.1     | RRM | 9  | 0 | 0 | RBPDB/QuickGO         | Found     |
| 84875      | PARP10       | poly(ADP-ribose) polymerase family member 10                      | ARTD10                                   | NP_116178.2     | RRM | 8  | 1 | 1 | RBPDB                 | Found     |
| 23592      | LEMD3        | LEM domain containing 3                                           | MAN1                                     | NP_055134.2     | RRM | 6  | 0 | 0 | RBPDB                 | Found     |
| 79869      | CPSF7        | cleavage and polyadenylation specific factor 7                    | CFIm59                                   | NP_079087.3     | RRM | 5  | 0 | 1 | RBPDB/QuickGO         | Found     |
| 11030      | RBPMS        | RNA binding protein, mRNA processing factor                       | HERMES                                   | NP_00100871 0.1 | RRM | 5  | 1 | 0 | RBPDB/QuickGO         | Found     |
| 9667       | SAFB2        | scaffold attachment factor B2                                     |                                          | NP_055464.1     | RRM | 5  | 2 | 0 | RBPDB/QuickGO         | Found     |
| 8867       | SYNJ1        | synaptojanin 1                                                    | EIEE53; INPP5G; PARK20                   | NP_003886.3     | RRM | 19 | 2 | 7 | RBPDB                 | Not found |
| 57055      | DAZ2         | deleted in azoospermia 2                                          | pDP1678                                  | NP_065096.2     | RRM | 18 | 0 | 0 | RBPDB                 | Not found |
| 57054      | DAZ3         | deleted in azoospermia 3                                          | pDP1679                                  | NP_065097.2     | RRM | 15 | 0 | 0 | RBPDB                 | Not found |
| 57135      | DAZ4         | deleted in azoospermia 4                                          | pDP1680; pDP1681                         | NP_00100537 5.1 | RRM | 14 | 0 | 0 | RBPDB                 | Not found |
| 8871       | SYNJ2        | synaptojanin 2                                                    | INPP5H                                   | NP_003889.1     | RRM | 12 | 3 | 3 | RBPDB                 | Not found |
| 1975       | EIF4B        | eukaryotic translation initiation factor 4B                       | EIF-4B; PRO1843                          | NP_00128775 0.1 | RRM | 8  | 1 | 1 | RBPDB/AttRACT/QuickGO | Not found |

|        |         |                                                    |                                             |                |                                      |    |   |   |                       |           |
|--------|---------|----------------------------------------------------|---------------------------------------------|----------------|--------------------------------------|----|---|---|-----------------------|-----------|
| 10495  | ENOX2   | ecto-NOX disulfide-thiol exchanger 2               | APK1; tNOX; COVA1                           | NP_872114.1    | RRM                                  | 6  | 1 | 0 | RBPDB                 | Not found |
| 54625  | PARP14  | poly(ADP-ribose) polymerase family member 14       | BAL2; ARTD8; pART8; PARP-14                 | NP_060024.2    | RRM                                  | 6  | 1 | 1 | RBPDB                 | Not found |
| 27037  | TRMT2A  | tRNA methyltransferase 2 homolog A                 | HTF9C                                       | NP_073564.3    | RRM                                  | 6  | 0 | 0 | RBPDB/QuickGO         | Not found |
| 9908   | G3BP2   | G3BP stress granule assembly factor 2              |                                             | NP_987101.1    | RRM                                  | 5  | 1 | 1 | RBPDB/AttRACT/QuickGO | Not found |
| 22828  | SCAF8   | SR-related CTD associated factor 8                 | RBM16                                       | NP_001273117.1 | RRM; CID                             | 24 | 1 | 0 | RBPDB                 | Found     |
| 84456  | L3MBTL3 | L3MBTL histone methyl-lysine binding protein 3     | MBT1; MBT-1                                 | NP_115814.1    | RRM; La                              | 8  | 0 | 1 | RBPDB                 | Found     |
| 58517  | RBM25   | RNA binding motif protein 25                       | S164; NET52; RNPC7; Snu71; RED120; fSAP94   | NP_067062.1    | RRM; PWI                             | 8  | 1 | 0 | RBPDB/AttRACT/QuickGO | Found     |
| 10594  | PRPF8   | pre-mRNA processing factor 8                       | PRP8; RP13; HPRP8; PRPC8; SNRNP220          | NP_006436.3    | RRM; U5-snRNA; U6-snRNA; RNaseH-like | 9  | 0 | 0 | QuickGO               | Found     |
| 282996 | RBM20   | RNA binding motif protein 20                       |                                             | NP_001127835.2 | RRM; Znf_C2H2x2                      | 14 | 1 | 2 | RBPDB                 | Found     |
| 54439  | RBM27   | RNA binding motif protein 27                       | Psc1; ARRS1; ZC3H18; ZC3H20                 | NP_061862.1    | RRM; Znf_CCCH                        | 12 | 1 | 0 | RBPDB/QuickGO         | Found     |
| 64852  | TUT1    | terminal uridylyl transferase 1, U6 snRNA-specific | PAPD2; RBM21; TENT1; URLC6; TUTase; STARPAP | NP_073741.3    | RRM; Znf_CCCH                        | 10 | 1 | 0 | RBPDB/AttRACT/QuickGO | Found     |
| 55696  | RBM22   | RNA binding motif protein 22                       | Cwc2; ZC3H16; fSAP47                        | NP_060517.1    | RRM; Znf_CCHC; Znf_CCCH              | 7  | 0 | 0 | RBPDB/QuickGO         | Found     |
| 2130   | EWSR1   | EWS RNA binding protein 1                          | EWS; EWS-FLI1; bK984G1.4                    | NP_053733.2    | RRM; Znf_RanBP2                      | 13 | 2 | 0 | RBPDB/QuickGO         | Found     |
| 4850   | CNOT4   | CCR4-NOT transcription complex subunit 4           | NOT4; NOT4H; CLONE243                       | NP_001177779.1 | RRM; Znf_RING                        | 5  | 0 | 0 | RBPDB/AttRACT/QuickGO | Not found |
| 57690  | TNRC6C  | Trinucleotide repeat-containing gene 6C protein    |                                             | NP_001136112.1 | RRMx1                                | 20 | 0 | 0 | RBPDB/QuickGO         | Found     |
| 146713 | RBFOX3  | RNA binding fox-1 homolog 3                        | FOX3; NEUN; FOX-3; HRNBP3                   | NP_001076044   | RRMx1                                | 6  | 1 | 0 | RBPDB/QuickGO         | Found     |
| 6421   | SFPQ    | splicing factor proline and glutamine rich         | PSF; POMP100; PPP1R140                      | NP_005057.1    | RRMx2                                | 20 | 0 | 1 | RBPDB/AttRACT/QuickGO | Found     |
| 10262  | SF3B4   | splicing factor 3b subunit 4                       | AFD1; Hsh49; SAP49; SF3b49                  | NP_005841.1    | RRMx2                                | 17 | 2 | 2 | RBPDB/QuickGO         | Found     |

|        |        |                                                         |                                                    |                |                             |    |   |   |                       |           |
|--------|--------|---------------------------------------------------------|----------------------------------------------------|----------------|-----------------------------|----|---|---|-----------------------|-----------|
| 22849  | CPEB3  | cytoplasmic polyadenylation element binding protein 3   |                                                    | NP_055727.3    | RRMx2                       | 13 | 1 | 0 | RBPDB/QuickGO         | Found     |
| 26528  | DAZAP1 | DAZ associated protein 1                                |                                                    | NP_733829.1    | RRMx2                       | 9  | 1 | 0 | RBPDB/AttRACT/QuickGO | Found     |
| 132864 | CPEB2  | cytoplasmic polyadenylation element binding protein 2   | CPEB-2; CPE-BP2; hCPEB-2                           | NP_001170853.1 | RRMx2                       | 8  | 1 | 0 | RBPDB/AttRACT/QuickGO | Found     |
| 55599  | RNPC3  | RNA binding region (RNP1, RRM) containing 3             | RNP; IGHD5; RBM40; SNRNP65                         | NP_060089.1    | RRMx2                       | 8  | 0 | 0 | RBPDB                 | Found     |
| 10180  | RBM6   | RNA binding motif protein 6                             | 3G2; g16; DEF3; DEF-3; HLC-11; NY-LU-12            | NP_005768.1    | RRMx2                       | 7  | 1 | 1 | RBPDB/AttRACT/QuickGO | Found     |
| 64506  | CPEB1  | cytoplasmic polyadenylation element binding protein 1   | CPEB; CPEB-1; h-CPEB; CPE-BP1; hCPEB-1             | NP_085097.3    | RRMx2                       | 6  | 1 | 0 | RBPDB/AttRACT         | Found     |
| 3191   | HNRNPL | heterogeneous nuclear ribonucleoprotein L               | HNRPL; hnRNP-L; P/OKcl.14                          | NP_001524.2    | RRMx2                       | 6  | 0 | 0 | RBPDB/AttRACT/QuickGO | Found     |
| 55269  | PSPC1  | paraspeckle component 1                                 | PSP1                                               | NP_001035879.1 | RRMx2                       | 6  | 0 | 0 | RBPDB/QuickGO         | Found     |
| 80315  | CPEB4  | cytoplasmic polyadenylation element binding protein 4   | CPE-BP4; hCPEB-4                                   | NP_085130.2    | RRMx2                       | 5  | 1 | 0 | RBPDB/AttRACT/QuickGO | Found     |
| 9665   | MARF1  | meiosis regulator and mRNA stability factor 1           | LKAP; LMKB; PPP1R34; KIAA0430                      | NP_055462.2    | RRMx2                       | 9  | 0 | 0 | RBPDB                 | Not found |
| 27303  | RBMS3  | RNA binding motif single stranded interacting protein 3 |                                                    | NP_001003793.1 | RRMx2                       | 5  | 0 | 0 | RBPDB/AttRACT/QuickGO | Not found |
| 8241   | RBM10  | RNA binding motif protein 10                            | S1-1; TARPS; GPATC9; ZRANB5; GPATCH9; DXS8237E     | NP_005667.2    | RRMx2; Znf_C2H2; Znf_RanBP2 | 5  | 1 | 1 | RBPDB/QuickGO         | Found     |
| 64062  | RBM26  | RNA binding motif protein 26                            | ARRS2; SE70-2; ZC3H17; PRO1777; C13orf10; PPP1R132 | NP_001273560.1 | RRMx2; Znf_CCCH             | 14 | 0 | 0 | RBPDB/QuickGO         | Found     |
| 1617   | DAZ1   | deleted in azoospermia 1                                | DAZ; SPGY                                          | NP_004072.3    | RRMx3                       | 16 | 0 | 0 | RBPDB                 | Found     |
| 125950 | RAVER1 | ribonucleoprotein, PTB binding 1                        |                                                    | NP_001353103.1 | RRMx3                       | 11 | 0 | 2 | RBPDB/QuickGO         | Found     |
| 80004  | ESRP2  | epithelial splicing regulatory protein 2                | RBM35B                                             | NP_001352193.1 | RRMx3                       | 8  | 0 | 0 | RBPDB/AttRACT/QuickGO | Found     |

|        |         |                                                                     |                                               |                |       |    |   |   |                       |           |
|--------|---------|---------------------------------------------------------------------|-----------------------------------------------|----------------|-------|----|---|---|-----------------------|-----------|
| 54845  | ESRP1   | epithelial splicing regulatory protein 1                            | RBM35A; RMB35A; DFNBP109                      | NP_060167.2    | RRMx3 | 6  | 0 | 0 | RBPDB/AttrACT/QuickGO | Found     |
| 22827  | PUF60   | poly(U) binding splicing factor 60                                  | FIR; VRJS; RoBPI; SIAHBP1                     | NP_510965.1    | RRMx3 | 6  | 0 | 0 | RBPDB/QuickGO         | Found     |
| 29890  | RBM15B  | RNA binding motif protein 15B                                       | OTT3; HsOTT3; HUMAGCGB                        | NP_037418.3    | RRMx3 | 6  | 1 | 0 | RBPDB/QuickGO         | Found     |
| 11189  | CELF3   | CUGBP Elav-like family member 3                                     | CAGH4; ERDA4; ETR-1; TNRC4; BRUNOL1           | NP_009116.3    | RRMx3 | 5  | 0 | 0 | QuickGO               | Found     |
| 56853  | CELF4   | CUGBP Elav-like family member 4                                     | CELF-4; BRUNOL4                               | NP_001340669.1 | RRMx3 | 5  | 0 | 0 | AttrACT/QuickGO       | Found     |
| 60680  | CELF5   | CUGBP Elav-like family member 5                                     | CELF-5; BRUNOL5; BRUNOL-5                     | NP_068757.2    | RRMx3 | 5  | 0 | 0 | AttrACT               | Found     |
| 166863 | RBM46   | RNA binding motif protein 46                                        | CT68                                          | NP_659416.1    | RRMx3 | 5  | 0 | 1 | RBPDB/AttrACT         | Not found |
| 23013  | SPEN    | spen family transcriptional repressor                               | MINT; SHARP; RBM15C; HIAA0929                 | NP_055816.2    | RRMx4 | 37 | 0 | 1 | RBPDB/QuickGO         | Found     |
| 10137  | RBM12   | RNA binding motif protein 12                                        | SWAN; SCZD19; HRIHFB2091                      | NP_006038.2    | RRMx4 | 18 | 0 | 0 | RBPDB/QuickGO         | Found     |
| 80336  | PABPC1L | poly(A) binding protein cytoplasmic 1 like                          | EPAB; PABPC1L1; C20orf119; dJ1069P2.3         | NP_001118228.1 | RRMx4 | 6  | 0 | 1 | RBPDB                 | Not found |
| 60677  | CELF6   | CUGBP Elav-like family member 6                                     | BRUNOL6                                       | NP_443072.3    | RRMx5 | 6  | 0 | 0 | AttrACT               | Not found |
| 9904   | RBM19   | RNA binding motif protein 19                                        | Mrd1                                          | NP_001140171.1 | RRMx6 | 5  | 0 | 0 | RBPDB/QuickGO         | Found     |
| 57805  | CCAR2   | cell cycle and apoptosis regulator 2                                | DBC1; DBC-1; NET35; p30DBC; p30 DBC; KIAA1967 | NP_066997.3    | S1    | 7  | 2 | 1 | QuickGO               | Found     |
| 1659   | DHX8    | DEAH-box helicase 8                                                 | DDX8; Dhr2; HRH1; PRP22; PRPF22               | NP_004932.1    | S1    | 7  | 1 | 0 | RBPDB/QuickGO         | Found     |
| 6830   | SUPT6H  | SPT6 homolog, histone chaperone and transcription elongation factor | SPT6; SPT6H; emb-5                            | NP_001307684.1 | S1    | 5  | 1 | 0 | RBPDB/QuickGO         | Found     |
| 55095  | SAMD4B  | sterile alpha motif domain containing 4B                            | SMGB; Smaug2                                  | NP_060498.2    | SAM   | 7  | 1 | 0 | RBPDB/QuickGO         | Not found |
| 201191 | SAMD14  | sterile alpha motif domain containing 14                            |                                               | NP_777580.1    | SAM   | 6  | 0 | 0 | RBPDB                 | Not found |



|            |           |                                                   |                                                                        |                 |             |    |   |   |                 |           |
|------------|-----------|---------------------------------------------------|------------------------------------------------------------------------|-----------------|-------------|----|---|---|-----------------|-----------|
| 10992      | SF3B2     | splicing factor 3b subunit 2                      | Cus1; SF3b1; SAP145; SF3B145; SF3b150                                  | NP_006833.2     | SAP         | 17 | 1 | 1 | QuickGO         | Found     |
| 11100      | HNRNPU L1 | heterogeneous nuclear ribonucleoprotein U like 1  | E1BAP5; E1B-AP5; HNRPUL1                                               | NP_008971.2     | SAP; SPRY   | 12 | 0 | 0 | QuickGO         | Found     |
| 3192       | HNRNPU    | heterogeneous nuclear ribonucleoprotein U         | SAFA; HNRPU; SAF-A; U21.1; pp120; EIEE54; GRIP120; hnRNP U; HNRNPU-AS1 | NP_114032.2     | SAP; SPRY   | 7  | 0 | 1 | AttrACT/QuickGO | Found     |
| 10523      | CHERP     | calcium homeostasis endoplasmic reticulum protein | SRA1; DAN16; SCAF6                                                     | NP_006378.3     | SURP        | 22 | 1 | 1 | RBPDB/QuickGO   | Not found |
| 10291      | SF3A1     | splicing factor 3a subunit 1                      | PRP21; PRPF21; SAP114; SF3A120                                         | NP_005868.1     | SURPx2      | 21 | 0 | 0 | RBPDB/QuickGO   | Found     |
| 23518      | R3HDM1    | R3H domain containing 1                           | R3HDM                                                                  | NP_00126972.7.1 | SUZ         | 14 | 0 | 0 | QuickGO         | Found     |
| 7011       | TEP1      | telomerase associated protein 1                   | TP1; TLP1; p240; TROVE1; VAULT2                                        | NP_009041.2     | TROVE       | 12 | 1 | 4 | RBPDB           | Found     |
| 25929      | GEMIN5    | gem nuclear organelle associated protein 5        | GEMIN-5                                                                | NP_056280.2     | WD40_repeat | 9  | 2 | 0 | QuickGO         | Found     |
| 64848      | YTHDC2    | YTH domain containing 2                           | CAHL; hYTHDC2                                                          | NP_073739.3     | YTH         | 8  | 0 | 1 | RBPDB/QuickGO   | Found     |
| 51441      | YTHDF2    | YTH N6-methyladenosine RNA binding protein 2      | CAHL; HGRG8; NY-REN-2                                                  | NP_057342.2     | YTH         | 5  | 0 | 0 | RBPDB/QuickGO   | Found     |
| 25394<br>3 | YTHDF3    | YTH N6-methyladenosine RNA binding protein 3      |                                                                        | NP_689971.4     | YTH         | 5  | 0 | 0 | RBPDB/QuickGO   | Found     |
| 54915      | YTHDF1    | YTH N6-methyladenosine RNA binding protein 1      | C20orf21                                                               | NP_060268.2     | YTH         | 7  | 0 | 0 | RBPDB/QuickGO   | Not found |
| 23131      | GPATCH8   | G-patch domain containing 8                       | GPATC8; KIAA0553                                                       | NP_00100290.9.1 | zf-C2H2     | 14 | 0 | 1 | QuickGO         | Found     |
| 8175       | SF3A2     | splicing factor 3a subunit 2                      | PRP11; SAP62; PRPF11; SF3a66                                           | NP_009096.2     | Znf_C2H2    | 32 | 0 | 0 | QuickGO         | Found     |
| 8470       | SORBS2    | sorbin and SH3 domain containing 2                | ARGBP2; PRO0618                                                        | NP_00125770.0.1 | Znf_C2H2    | 14 | 0 | 3 | QuickGO         | Found     |
| 6631       | SNRPC     | small nuclear ribonucleoprotein polypeptide C     | U1C; Yhc1                                                              | NP_003084.1     | Znf_C2H2    | 9  | 0 | 0 | RBPDB/QuickGO   | Found     |
| 90850      | ZNF598    | zinc finger protein 598                           | HEL2                                                                   | NP_835461.2     | Znf_C2H2    | 11 | 1 | 1 | QuickGO         | Not found |
| 85441      | HELZ2     | helicase with zinc finger 2                       | PDIP-1; PRIC285                                                        | NP_00103241.2.2 | Znf_C2H2    | 9  | 0 | 1 | QuickGO         | Not found |
| 79724      | ZNF768    | zinc finger protein 768                           |                                                                        | NP_078947.3     | Znf_C2H2x10 | 10 | 2 | 0 | QuickGO         | Found     |

|            |         |                                                |                                                |                    |                       |    |   |   |                           |           |
|------------|---------|------------------------------------------------|------------------------------------------------|--------------------|-----------------------|----|---|---|---------------------------|-----------|
| 29803      | REPIN1  | replication initiator 1                        | AP4; RIP60;<br>ZNF464; Zfp464                  | NP_037532.2        | Znf_C2H2x15           | 7  | 1 | 0 | QuickGO                   | Found     |
| 7756       | ZNF207  | zinc finger protein 207                        | BuGZ; hBuGZ                                    | NP_00109197<br>7.1 | Znf_C2H2x2            | 21 | 0 | 0 | QuickGO                   | Found     |
| 27332      | ZNF638  | zinc finger protein 638                        | ZFML; NP220;<br>Zfp638                         | NP_00101497<br>2.1 | Znf_C2H2x2;<br>RRMx2  | 8  | 1 | 0 | RBPDB/AttRACT/Quick<br>GO | Found     |
| 23217      | ZFR2    | zinc finger RNA binding<br>protein 2           | KIAA1086                                       | NP_055989.1        | Znf_C2H2x3            | 20 | 0 | 1 | RBPDB                     | Found     |
| 25946      | ZNF385A | zinc finger protein 385A                       | HZF; RZF; ZFP385;<br>ZNF385                    | NP_00112443<br>9.1 | Znf_C2H2x3            | 8  | 2 | 0 | QuickGO                   | Found     |
| 16303<br>3 | ZNF579  | zinc finger protein 579                        |                                                | NP_689813.2        | Znf_C2H2x8            | 12 | 0 | 3 | QuickGO                   | Found     |
| 5514       | PPP1R10 | protein phosphatase 1<br>regulatory subunit 10 | p99; FB19; R111;<br>CAT53; PNUIS;<br>PP1R10    | NP_002705.2        | Znf_CCCH              | 17 | 0 | 3 | RBPDB/QuickGO             | Found     |
| 12424<br>5 | ZC3H18  | zinc finger CCCH-type<br>containing 18         | NHN1                                           | NP_00128126<br>9.1 | Znf_CCCH              | 16 | 0 | 1 | RBPDB/QuickGO             | Found     |
| 23144      | ZC3H3   | zinc finger CCCH-type<br>containing 3          | ZC3HDC3                                        | NP_055932.2        | Znf_CCCH              | 14 | 0 | 2 | RBPDB                     | Found     |
| 19644<br>1 | ZFC3H1  | zinc finger C3H1-type<br>containing            | CSRC2; PSRC2;<br>CCDC131                       | NP_659419.3        | Znf_CCCH              | 13 | 0 | 1 | QuickGO                   | Found     |
| 80149      | ZC3H12A | zinc finger CCCH-type<br>containing 12A        | Reg1; MCPIP;<br>MCPIP1; MCPIP-1;<br>dJ423B22.1 | NP_00131047<br>9.1 | Znf_CCCH              | 12 | 0 | 2 | RBPDB/QuickGO             | Found     |
| 34015<br>2 | ZC3H12D | zinc finger CCCH-type<br>containing 12D        | TFL; p34; MCPIP4;<br>C6orf95; dJ281H8.1        | NP_997243.2        | Znf_CCCH              | 10 | 2 | 0 | RBPDB                     | Found     |
| 23091      | ZC3H13  | zinc finger CCCH-type<br>containing 13         | Xio; KIAA0853                                  | NP_00107025<br>6.1 | Znf_CCCH              | 9  | 1 | 1 | RBPDB/QuickGO             | Found     |
| 9931       | HELZ    | helicase with zinc finger                      | DHRC; DRHC;<br>HUMORF5                         | NP_00131737<br>6.1 | Znf_CCCH              | 21 | 1 | 4 | RBPDB/QuickGO             | Not found |
| 85463      | ZC3H12C | zinc finger CCCH-type<br>containing 12C        | MCPIP3                                         | NP_203748.1        | Znf_CCCH              | 7  | 1 | 2 | RBPDB                     | Not found |
| 94059      | LENG9   | leukocyte receptor cluster<br>member 9         |                                                | NP_945339.2        | Znf_CCCH              | 6  | 0 | 1 | RBPDB                     | Not found |
| 80742      | PRR3    | proline rich 3                                 | CAT56                                          | NP_079539.2        | Znf_CCCH              | 6  | 0 | 1 | RBPDB/QuickGO             | Not found |
| 55621      | TRMT1   | tRNA methyltransferase 1                       | TRM1; MRT68                                    | NP_060192.1        | Znf_CCCH              | 6  | 0 | 0 | RBPDB/QuickGO             | Not found |
| 34055<br>4 | ZC3H12B | zinc finger CCCH-type<br>containing 12B        | MCPIP2; CXorf32                                | NP_00101088<br>8.3 | Znf_CCCH              | 6  | 1 | 0 | RBPDB                     | Not found |
| 14904<br>1 | RC3H1   | ring finger and CCCH-type<br>domains 1         | RNF198; ROQUIN                                 | NP_00128777<br>9.1 | Znf_CCCH;<br>Znf_RING | 19 | 4 | 0 | RBPDB/AttRACT/Quick<br>GO | Not found |

|        |         |                                        |                                                   |                |                      |    |   |   |                       |           |
|--------|---------|----------------------------------------|---------------------------------------------------|----------------|----------------------|----|---|---|-----------------------|-----------|
| 54542  | RC3H2   | ring finger and CCCH-type domains 2    | MNAB; RNF164                                      | NP_001094058.1 | Znf_CCCH; Znf_RING   | 13 | 1 | 0 | RBPDB/QuickGO         | Not found |
| 23211  | ZC3H4   | zinc finger CCCH-type containing 4     | C19orf7                                           | NP_055983.1    | Znf_CCCHx2           | 39 | 1 | 1 | RBPDB/QuickGO         | Found     |
| 376940 | ZC3H6   | zinc finger CCCH-type containing 6     | ZC3HDC6                                           | NP_940983.2    | Znf_CCCHx2           | 14 | 0 | 0 | RBPDB                 | Found     |
| 7538   | ZFP36   | ZFP36 ring finger protein              | TTP; GOS24; GOS24; TIS11; NUP475; zfp-36; RNF162A | NP_003398.3    | Znf_CCCHx2           | 10 | 1 | 0 | RBPDB/AttRACT/QuickGO | Found     |
| 79882  | ZC3H14  | zinc finger CCCH-type containing 14    | SUT2; MRT56; UKp68; MSUT-2; NY-REN-37             | NP_079100.2    | Znf_CCCHx2           | 8  | 0 | 1 | RBPDB/QuickGO         | Found     |
| 678    | ZFP36L2 | ZFP36 ring finger protein like 2       | BRF2; ERF2; ERF-2; TIS11D; RNF162C                | NP_008818.3    | Znf_CCCHx2           | 9  | 0 | 0 | RBPDB/AttRACT/QuickGO | Not found |
| 23318  | TUT4    | terminal uridylyl transferase 4        | PAPD3; TENT3A; ZCCHC11                            | NP_001009881.1 | Znf_CCCHx3           | 15 | 3 | 0 | QuickGO               | Found     |
| 64718  | UNKL    | unk like zinc finger                   | ZC3H5L; C16orf28; ZC3HDC5L                        | NP_001180317.2 | Znf_CCCHx3           | 8  | 1 | 1 | RBPDB                 | Not found |
| 84872  | ZC3H10  | zinc finger CCCH-type containing 10    | ZC3HDC10                                          | NP_116175.1    | Znf_CCCHx3           | 5  | 0 | 0 | RBPDB/AttRACT/QuickGO | Not found |
| 7681   | MKRN3   | makorin ring finger protein 3          | CPPB2; D15S9; RNF63; ZFP127; ZNF127               | NP_005655.1    | Znf_CCCHx3; Znf_RING | 6  | 0 | 1 | RBPDB                 | Not found |
| 4154   | MBNL1   | muscleblind like splicing regulator 1  | EXP; MBNL                                         | NP_066368.2    | Znf_CCCHx4           | 6  | 0 | 1 | RBPDB/AttRACT/QuickGO | Found     |
| 10150  | MBNL2   | muscleblind like splicing regulator 2  | MBLL; MBLL39; PRO2032                             | NP_659002.1    | Znf_CCCHx4           | 5  | 0 | 0 | RBPDB/QuickGO         | Found     |
| 55796  | MBNL3   | muscleblind like splicing regulator 3  | CHCR; MBLX; MBXL; MBLX39                          | NP_060858.2    | Znf_CCCHx4           | 6  | 0 | 0 | RBPDB/QuickGO         | Not found |
| 23264  | ZC3H7B  | zinc finger CCCH-type containing 7B    | RoXaN; ROXAN1                                     | NP_060060.3    | Znf_CCCHx5           | 9  | 0 | 0 | RBPDB/QuickGO         | Not found |
| 85451  | UNK     | unk zinc finger                        | ZC3H5; UNKEMPT; ZC3HDC5                           | NP_001073888.2 | Znf_CCCHx5           | 8  | 0 | 0 | RBPDB/QuickGO         | Not found |
| 5930   | RBBP6   | RB binding protein 6, ubiquitin ligase | PACT; MY038; P2P-R; RBQ-1; SNAMA                  | NP_008841.2    | Znf_CCHC             | 13 | 0 | 2 | QuickGO               | Found     |
| 23089  | PEG10   | paternally expressed 10                | EDR; HB-1; Mar2; RTL2; MEF3L; Mart2; RGAG3; SIRH1 | NP_001165908.1 | Znf_CCHC             | 12 | 0 | 1 | QuickGO               | Found     |
| 55596  | ZCCHC8  | zinc finger CCHC-type containing 8     |                                                   | NP_060082.2    | Znf_CCHC             | 6  | 0 | 0 | QuickGO               | Found     |

|        |        |                                               |                                                                                                |                |            |    |   |   |               |           |
|--------|--------|-----------------------------------------------|------------------------------------------------------------------------------------------------|----------------|------------|----|---|---|---------------|-----------|
| 79670  | TUT7   | terminal uridylyl transferase 7               | PAPD6; TENT3B; ZCCHC6                                                                          | NP_078893.2    | Znf_CCHCx3 | 7  | 3 | 0 | QuickGO       | Found     |
| 84186  | ZCCHC7 | zinc finger CCHC-type containing 7            | AIR1; HSPC086                                                                                  | NP_001276050.1 | Znf_CCHCx4 | 5  | 0 | 1 | QuickGO       | Found     |
| 9169   | SCAF11 | SR-related CTD associated factor 11           | SIP1; CASP11; SFRS2IP; SRRP129; SRSF2IP                                                        | NP_004710.2    | Znf_RING   | 5  | 0 | 0 | QuickGO       | Found     |
| 9666   | DZIP3  | DAZ interacting zinc finger protein 3         | UURF2; PPP1R66; hRUL138                                                                        | NP_055463.1    | Znf_RING   | 6  | 0 | 1 | QuickGO       | Not found |
| 131405 | TRIM71 | tripartite motif containing 71                | LIN41; LIN-41                                                                                  | NP_001034200.1 | Znf_RING   | 5  | 1 | 1 | QuickGO       | Not found |
| 10270  | AKAP8  | A-kinase anchoring protein 8                  | AKAP-8; AKAP95; AKAP 95; AKAP-95                                                               | NP_005849.1    | Znf-C2H2   | 5  | 1 | 0 | QuickGO       | Found     |
| 58508  | KMT2C  | lysine methyltransferase 2C                   | HALR; MLL3; KLEFS2                                                                             | NP_733751.2    | Znf-RanBP2 | 62 | 2 | 3 | QuickGO       | Found     |
| 7916   | PRRC2A | proline rich coiled-coil 2A                   | G2; BAT2; D6S51; D6S51E                                                                        | NP_004629.3    |            | 68 | 5 | 6 | QuickGO       | Found     |
| 23524  | SRRM2  | serine/arginine repetitive matrix 2           | CWF21; Cwc21; 300-KD; SRL300; SRm300; HSPC075                                                  | NP_057417.3    |            | 32 | 2 | 4 | RBPDB/QuickGO | Found     |
| 2316   | FLNA   | filamin A                                     | FLN; FMD; MNS; OPD; ABPX; CSBS; CVD1; FGS2; FLN1; NHBP; OPD1; OPD2; XLVD; XMVD; FLN-A; ABP-280 | NP_001104026.1 |            | 31 | 0 | 5 | QuickGO       | Found     |
| 57666  | FBRSL1 | fibrosin like 1                               |                                                                                                | NP_001136113.1 |            | 27 | 4 | 3 | QuickGO       | Found     |
| 51729  | WBP11  | WW domain binding protein 11                  | NPWBP; SIPP1; WBP-11; PPP1R165                                                                 | NP_057396.1    |            | 27 | 3 | 2 | QuickGO       | Found     |
| 27043  | PELP1  | proline, glutamate and leucine rich protein 1 | MNAR; P160                                                                                     | NP_055204.4    |            | 26 | 3 | 0 | QuickGO       | Found     |
| 11083  | DIDO1  | death inducer-obliterator 1                   | BYE1; DIO1; DATF1; DIDO2; DIDO3; DIO-1; DATF-1; C20orf158; dJ885L7.8                           | NP_149072.2    |            | 25 | 0 | 0 | QuickGO       | Found     |
| 11273  | ATXN2L | ataxin 2 like                                 | A2D; A2LG; A2LP; A2RP                                                                          | NP_009176.2    |            | 24 | 0 | 0 | QuickGO       | Found     |
| 55339  | WDR33  | WD repeat domain 33                           | NET14; WDC146                                                                                  | NP_060853.3    |            | 22 | 2 | 0 | QuickGO       | Found     |

|       |         |                                                                   |                                                                                                  |                |  |    |   |   |         |       |
|-------|---------|-------------------------------------------------------------------|--------------------------------------------------------------------------------------------------|----------------|--|----|---|---|---------|-------|
| 1981  | EIF4G1  | eukaryotic translation initiation factor 4 gamma 1                | P220; EIF4F; EIF4G; EIF4GI; PARK18; EIF-4G1                                                      | NP_886553.3    |  | 21 | 2 | 1 | QuickGO | Found |
| 1107  | CHD3    | chromodomain helicase DNA binding protein 3                       | ZFH; Mi-2a; SNIBCPS; Mi2-ALPHA                                                                   | NP_001005273.1 |  | 18 | 0 | 1 | QuickGO | Found |
| 54954 | FAM120C | family with sequence similarity 120C                              | ORF34; CXorf17                                                                                   | NP_060318.4    |  | 18 | 0 | 0 | QuickGO | Found |
| 10075 | HUWE1   | HECT, UBA and WWE domain containing E3 ubiquitin protein ligase 1 | MULE; Ib772; LASU1; MRXST; UREB1; HECTH9; URE-B1; ARF-BP1; HSPC272                               | NP_113584.3    |  | 18 | 0 | 0 | QuickGO | Found |
| 7791  | ZYX     | zyxin                                                             | ESP-2; HED-2                                                                                     | NP_003452.1    |  | 18 | 0 | 0 | QuickGO | Found |
| 8621  | CDK13   | cyclin dependent kinase 13                                        | CHED; CDC2L; CDC2L5; hCDK13; CHDFIDD                                                             | NP_003709.3    |  | 17 | 1 | 0 | QuickGO | Found |
| 10915 | TCERG1  | transcription elongation regulator 1                              | Urn1; CA150; TAF2S                                                                               | NP_006697.2    |  | 17 | 2 | 1 | QuickGO | Found |
| 6942  | TCF20   | transcription factor 20                                           | AR1; SPBP; TCF-20                                                                                | NP_005641.1    |  | 17 | 0 | 2 | QuickGO | Found |
| 57142 | RTN4    | reticulon 4                                                       | ASY; NSP; NOGO; RTN-X; NSP-CL; RTN4-A; RTN4-C; RTN4-B1; RTN4-B2; NI220/250; Nbla00271; Nbla10545 | NP_065393.1    |  | 15 | 1 | 2 | QuickGO | Found |
| 311   | ANXA11  | annexin A11                                                       | ALS23; AN1; CAP50; CAP-50                                                                        | NP_001148.1    |  | 13 | 0 | 0 | QuickGO | Found |
| 79080 | CCDC86  | coiled-coil domain containing 86                                  |                                                                                                  | NP_077003.1    |  | 12 | 0 | 0 | QuickGO | Found |
| 25962 | VIRMA   | vir like m6A methyltransferase associated                         | MSTP054; fSAP121; KIAA1429                                                                       | NP_056311.2    |  | 12 | 3 | 3 | QuickGO | Found |
| 9530  | BAG4    | BCL2 associated athanogene 4                                      | SODD; BAG-4                                                                                      | NP_004865.1    |  | 11 | 1 | 1 | QuickGO | Found |
| 1759  | DNM1    | dynamin 1                                                         | DNM; EIEE31                                                                                      | NP_004399.2    |  | 11 | 2 | 4 | QuickGO | Found |
| 4204  | MECP2   | methyl-CpG binding protein 2                                      | RS; RTS; RTT; PPMX; MR6; MRX79; MRXSL; AUTSX3; MRXS13                                            | NP_004983.1    |  | 11 | 0 | 0 | QuickGO | Found |

|       |         |                                                  |                                                                           |                |  |    |   |   |         |       |
|-------|---------|--------------------------------------------------|---------------------------------------------------------------------------|----------------|--|----|---|---|---------|-------|
| 5591  | PRKDC   | protein kinase, DNA-activated, catalytic subunit | HYRC; p350; DNAPK; DNP1; HYRC1; IMD26; XRCC7; DNAPKc; DNA-PKC; DNA-PKcs   | NP_008835.5    |  | 11 | 0 | 0 | QuickGO | Found |
| 9898  | UBAP2L  | ubiquitin associated protein 2 like              | NICE4; NICE-4                                                             | NP_055662.3    |  | 11 | 0 | 0 | QuickGO | Found |
| 27340 | UTP20   | UTP20 small subunit processome component         | DRIM; 1A6/DRIM                                                            | NP_055318.2    |  | 11 | 0 | 1 | QuickGO | Found |
| 6829  | SUPT5H  | SPT5 homolog, DSIF elongation factor subunit     | SPT5; SPT5H; Tat-CT1                                                      | NP_003160.2    |  | 10 | 0 | 1 | QuickGO | Found |
| 118   | ADD1    | adducin 1                                        | ADDA                                                                      | NP_001341690.1 |  | 9  | 0 | 0 | QuickGO | Found |
| 23246 | BOP1    | BOP1 ribosomal biogenesis factor                 |                                                                           | NP_056016.1    |  | 9  | 0 | 1 | QuickGO | Found |
| 81608 | FIP1L1  | factor interacting with PAPOLA and CPSF1         | Rhe; FIP1; hFip1                                                          | NP_112179.2    |  | 9  | 0 | 0 | QuickGO | Found |
| 10514 | MYBBP1A | MYB binding protein 1a                           | P160; PAP2; Pol5                                                          | NP_001099008.1 |  | 9  | 0 | 1 | QuickGO | Found |
| 22864 | R3HDM2  | R3H domain containing 2                          | CAG6; PR01365                                                             | NP_001317050.1 |  | 9  | 0 | 0 | QuickGO | Found |
| 23076 | RRP1B   | ribosomal RNA processing 1B                      | Nnp1; RRP1; NNP1L; KIAA0179; PPP1R136                                     | NP_055871.1    |  | 9  | 0 | 1 | QuickGO | Found |
| 6949  | TCOF1   | treacle ribosome biogenesis factor 1             | TCS; MFD1; TCS1; treacle                                                  | NP_001128715.1 |  | 9  | 0 | 0 | QuickGO | Found |
| 7015  | TERT    | telomerase reverse transcriptase                 | TP2; TRT; CMM9; EST2; TCS1; hTRT; DKCA2; DKCB4; hEST2; PFBMFT1NP_937983.2 | NP_937983.2    |  | 9  | 2 | 3 | QuickGO | Found |
| 63893 | UBE2O   | ubiquitin conjugating enzyme E2 O                | E2-230K                                                                   | NP_071349.3    |  | 9  | 0 | 1 | QuickGO | Found |
| 57602 | USP36   | ubiquitin specific peptidase 36                  | DUB1                                                                      | NP_001308220.1 |  | 9  | 1 | 0 | QuickGO | Found |
| 904   | CCNT1   | cyclin T1                                        | CCNT; CYCT1; HIVE1                                                        | NP_001231.2    |  | 8  | 0 | 0 | QuickGO | Found |
| 4150  | MAZ     | MYC associated zinc finger protein               | PUR1; ZF87; Pur-1; SAF-1; SAF-2; SAF-3; Zif87; ZNF801                     | NP_001036004.1 |  | 8  | 0 | 0 | QuickGO | Found |

|       |         |                                                      |                                                                                                                      |                    |  |   |   |   |         |       |
|-------|---------|------------------------------------------------------|----------------------------------------------------------------------------------------------------------------------|--------------------|--|---|---|---|---------|-------|
| 310   | ANXA7   | annexin A7                                           | SNX; ANX7;<br>SYNEXIN                                                                                                | NP_004025.1        |  | 7 | 0 | 0 | QuickGO | Found |
| 984   | CDK11B  | cyclin dependent kinase 11B                          | p58; PK58; CDK11;<br>CLK-1; CDC2L1;<br>PITSLREA; p58CLK-<br>1; CDK11-p46;<br>CDK11-p58;<br>p58CDC2L1; CDK11-<br>p110 | NP_001778.2        |  | 7 | 1 | 1 | QuickGO | Found |
| 23019 | CNOT1   | CCR4-NOT transcription complex subunit 1             | NOT1; CDC39;<br>NOT1H; AD-005                                                                                        | NP_057368.3        |  | 7 | 1 | 0 | QuickGO | Found |
| 5394  | EXOSC10 | exosome component 10                                 | p2; p3; p4; RRP6;<br>PMSCL; Rrp6p; PM-<br>Scl; PMSCL2;<br>PM/Scl-100                                                 | NP_00100199<br>8.1 |  | 7 | 0 | 0 | QuickGO | Found |
| 3428  | IFI16   | interferon gamma inducible protein 16                | PYHIN2; IFNGIP1                                                                                                      | NP_00135179<br>6.1 |  | 7 | 0 | 0 | QuickGO | Found |
| 23028 | KDM1A   | lysine demethylase 1A                                | AOF2; CPRF; KDM1;<br>LSD1; BHC110                                                                                    | NP_00100999<br>9.1 |  | 7 | 0 | 0 | QuickGO | Found |
| 56257 | MEPCE   | methylphosphate capping enzyme                       | BCDIN3                                                                                                               | NP_062552.2        |  | 7 | 0 | 1 | QuickGO | Found |
| 4928  | NUP98   | nucleoporin 9                                        | ADIR2; NUP96;<br>NUP196                                                                                              | NP_00135205<br>5.1 |  | 7 | 1 | 0 | QuickGO | Found |
| 5586  | PKN2    | protein kinase N2                                    | PAK2; PRK2; STK7;<br>Pak-2; PRKCL2;<br>PRO2042                                                                       | NP_006247.1        |  | 7 | 0 | 1 | QuickGO | Found |
| 6733  | SRPK2   | SRSF protein kinase 2                                | SFRSK2                                                                                                               | NP_00133766<br>9.1 |  | 7 | 0 | 0 | QuickGO | Found |
| 23272 | TASOR   | transcription activation suppressor                  | RAP140; TASOR1;<br>se89-1; C3orf63;<br>FAM208A                                                                       | NP_00135256<br>4.1 |  | 7 | 0 | 1 | QuickGO | Found |
| 7175  | TPR     | translocated promoter region, nuclear basket protein |                                                                                                                      | NP_003283.2        |  | 7 | 4 | 1 | QuickGO | Found |
| 7343  | UBTF    | upstream binding transcription factor                | UBF; UBF1; UBF2;<br>UBF-1; CONDBA;<br>NOR-90                                                                         | NP_055048.1        |  | 7 | 0 | 1 | QuickGO | Found |
| 8531  | YBX3    | Y-box binding protein 3                              | CSDA; DBPA;<br>CSDA1; ZONAB                                                                                          | NP_003642.3        |  | 7 | 1 | 0 | QuickGO | Found |
| 1106  | CHD2    | chromodomain helicase DNA binding protein 2          | EEOC                                                                                                                 | NP_001262.3        |  | 6 | 0 | 0 | QuickGO | Found |

|        |         |                                                      |                                                  |                |  |   |   |   |         |       |
|--------|---------|------------------------------------------------------|--------------------------------------------------|----------------|--|---|---|---|---------|-------|
| 79066  | METTL16 | methyltransferase like 16                            | METT10D                                          | NP_076991.3    |  | 6 | 2 | 1 | QuickGO | Found |
| 9221   | NOLC1   | nucleolar and coiled-body phosphoprotein 1           | P130; NOPP130; NOPP140; NS5ATP13                 | NP_001271317.1 |  | 6 | 0 | 1 | QuickGO | Found |
| 25957  | PNISR   | PNN interacting serine and arginine rich protein     | SFRS18; HSPC306; SRrp130; C6orf111; bA98I9.2     | NP_001309334.1 |  | 6 | 0 | 1 | QuickGO | Found |
| 10155  | TRIM28  | tripartite motif containing 28                       | KAP1; TF1B; RNF96; TIF1B; PPP1R157               | NP_005753.1    |  | 6 | 0 | 1 | QuickGO | Found |
| 23350  | U2SURP  | U2 snRNP associated SURP domain containing           | SR140; fSAPa                                     | NP_001073884.1 |  | 6 | 2 | 0 | QuickGO | Found |
| 9875   | URB1    | URB1 ribosome biogenesis homolog                     | NPA1; C21orf108                                  | NP_055640.2    |  | 6 | 0 | 1 | QuickGO | Found |
| 23     | ABCF1   | ATP binding cassette subfamily F member 1            | ABC27; ABC50                                     | NP_001020262.1 |  | 5 | 0 | 0 | QuickGO | Found |
| 58509  | CACTIN  | cactin, spliceosome C complex subunit                | fSAPc; C19orf29; NY-REN-24                       | NP_001074012.1 |  | 5 | 0 | 1 | QuickGO | Found |
| 9343   | EFTUD2  | elongation factor Tu GTP binding domain containing 2 | MFDM; MFDGA; Snu114; Snrp116; SNRNP116; U5-116KD | NP_004238.3    |  | 5 | 0 | 0 | QuickGO | Found |
| 57727  | NCOA5   | nuclear receptor coactivator 5                       | CIA; bA465L10.6                                  | NP_066018.1    |  | 5 | 0 | 0 | QuickGO | Found |
| 54888  | NSUN2   | NOP2/Sun RNA methyltransferase 2                     | MISU; MRT5; SAKI; TRM4                           | NP_060225.4    |  | 5 | 0 | 0 | QuickGO | Found |
| 10940  | POP1    | POP1 homolog, ribonuclease P/MRP subunit             | ANXD2                                            | NP_001139332.1 |  | 5 | 0 | 0 | QuickGO | Found |
| 51535  | PPHLN1  | periphilin 1                                         | CR; HSPC206; HSPC232                             | NP_057572.5    |  | 5 | 0 | 0 | QuickGO | Found |
| 57109  | REXO4   | REX4 homolog, 3'-5' exonuclease                      | REX4; XPMC2; XPMC2H                              | NP_065118.2    |  | 5 | 0 | 0 | QuickGO | Found |
| 57794  | SUGP1   | SURP and G-patch domain containing 1                 | RBP; SF4; F23858                                 | NP_757386.2    |  | 5 | 0 | 0 | QuickGO | Found |
| 81550  | TDRD3   | tudor domain containing 3                            |                                                  | NP_001139542.1 |  | 5 | 2 | 0 | QuickGO | Found |
| 9100   | USP10   | ubiquitin specific peptidase 10                      | UBPO                                             | NP_001259004.1 |  | 5 | 0 | 0 | QuickGO | Found |
| 134430 | WDR36   | WD repeat domain 36                                  | GLC1G; UTP21; TAWDRP; TA-WDRP                    | NP_644810.1    |  | 5 | 0 | 0 | QuickGO | Found |



|        |         |                                                    |                                                                               |                 |  |    |   |   |         |           |
|--------|---------|----------------------------------------------------|-------------------------------------------------------------------------------|-----------------|--|----|---|---|---------|-----------|
| 55135  | WRAP53  | WD repeat containing antisense to TP53             | DKCB3; TCAB1; WDR79                                                           | NP_060551.2     |  | 5  | 0 | 1 | QuickGO | Found     |
| 23215  | PRRC2C  | proline rich coiled-coil 2C                        | XTP2; BAT2D1; BAT2L2; BAT2-iso                                                | NP_055987.2     |  | 34 | 2 | 3 | QuickGO | Not found |
| 2317   | FLNB    | filamin B                                          | AOI; FH1; SCT; TAP; LRS1; TABP; FLN-B; FLN1L; ABP-278; ABP-280                | NP_00115778.9.1 |  | 32 | 0 | 6 | QuickGO | Not found |
| 7373   | COL14A1 | collagen type XIV alpha 1 chain                    | UND                                                                           | NP_066933.1     |  | 28 | 1 | 1 | QuickGO | Not found |
| 6311   | ATXN2   | ataxin 2                                           | ATX2; SCA2; TNRC13                                                            | NP_002964.4     |  | 26 | 2 | 2 | QuickGO | Not found |
| 7145   | TNS1    | tensin 1                                           | TNS; MXRA6; MST091; MST122; MST127; MSTP091; MSTP122; MSTP127; PPP1R155       | NP_072174.3     |  | 25 | 0 | 3 | QuickGO | Not found |
| 1729   | DIAPH1  | diaphanous related formin 1                        | DIA1; DRF1; DFNA1; LFHL1; SCBMS; hDIA1                                        | NP_005210.3     |  | 24 | 1 | 1 | QuickGO | Not found |
| 165904 | XIRP1   | xin actin binding repeat containing 1              | Xin; CMYA1                                                                    | NP_919269.2     |  | 22 | 1 | 0 | QuickGO | Not found |
| 4035   | LRP1    | LDL receptor related protein 1                     | APR; KPA; LRP; A2MR; CD91; APOER; LRP1A; TGFBFR5; IGFBP3R; IGFBP-3R; IGFBP3R1 | NP_002323.2     |  | 20 | 1 | 2 | QuickGO | Not found |
| 79868  | ALG13   | ALG13 UDP-N-acetylglucosaminyltransferase subunit  | CDG1S; EIEE36; MDS031; TDRD13; CXorf45; GLT28D1; YGL047W                      | NP_00109339.2.1 |  | 19 | 0 | 1 | QuickGO | Not found |
| 8672   | EIF4G3  | eukaryotic translation initiation factor 4 gamma 3 | eIF4G 3; eIF4GII; eIF-4G 3                                                    | NP_00118573.0.1 |  | 18 | 1 | 1 | QuickGO | Not found |
| 84726  | PRRC2B  | proline rich coiled-coil 2B                        | BAT2L; BAT2L1; LQFBS-1; KIAA0515                                              | NP_037450.2     |  | 18 | 2 | 5 | QuickGO | Not found |
| 22999  | RIMS1   | regulating synaptic membrane exocytosis 1          | RIM; RIM1; CORD7; RAB3IP2                                                     | NP_055804.2     |  | 18 | 3 | 3 | QuickGO | Not found |
| 23255  | MTCL1   | microtubule crosslinking factor 1                  | SOGA2; CCDC165; KIAA0802                                                      | NP_056025.2     |  | 17 | 2 | 0 | QuickGO | Not found |

|         |         |                                           |                                                                                        |                 |  |    |   |   |         |           |
|---------|---------|-------------------------------------------|----------------------------------------------------------------------------------------|-----------------|--|----|---|---|---------|-----------|
| 22862   | FNDC3A  | fibronectin type III domain containing 3A | HUGO; FNDC3; bA203116.1; bA203116.5                                                    | NP_00107314 1.1 |  | 13 | 0 | 2 | QuickGO | Not found |
| 2194    | FASN    | fatty acid synthase                       | FAS; OA-519; SDR27                                                                     | NP_004095.4     |  | 12 | 0 | 1 | QuickGO | Not found |
| 10749   | KIF1C   | kinesin family member 1C                  | SAX2; LTXS1; SATX2; SPAX2; SPG58                                                       | NP_006603.2     |  | 12 | 1 | 2 | QuickGO | Not found |
| 11196   | SEC23IP | SEC23 interacting protein                 | P125; P125A; MSTP053                                                                   | NP_009121.1     |  | 12 | 0 | 0 | QuickGO | Not found |
| 23196   | FAM120A | family with sequence similarity 120A      | OSSA; C9orf10; HBVPTPAP                                                                | NP_055427.2     |  | 11 | 1 | 1 | QuickGO | Not found |
| 1778    | DYNC1H1 | dynein cytoplasmic 1 heavy chain 1        | p22; DHC1; DNCL; DYHC; HL-3; CMT20; DHC1a; DNCH1; DNECL; Dnchc1; SMALED1               | NP_001367.2     |  | 10 | 0 | 1 | QuickGO | Not found |
| 831     | CAST    | calpastatin                               | BS-17; PLACK                                                                           | NP_001741.4     |  | 9  | 0 | 0 | QuickGO | Not found |
| 26093   | CCDC9   | coiled-coil domain containing 9           |                                                                                        | NP_056418.1     |  | 9  | 1 | 0 | QuickGO | Not found |
| 26058   | GIGYF2  | GRB10 interacting GYF protein 2           | GYF2; PERQ2; PERQ3; PARK11; TNRC15                                                     | NP_00109661 7.1 |  | 9  | 1 | 0 | QuickGO | Not found |
| 4134    | MAP4    | microtubule associated protein 4          |                                                                                        | NP_002366.2     |  | 9  | 1 | 0 | QuickGO | Not found |
| 54726   | OTUD4   | OTU deubiquitinase 4                      | HIN1; DUBA6; HSHIN1                                                                    | NP_00135298 6.1 |  | 9  | 1 | 0 | QuickGO | Not found |
| 5339    | PLEC    | plectin                                   | HD1; PCN; EBS1; EBSO; PLTN; EBSMD; EBSND; EBSOG; EBSPA; PLEC1; LGMD2Q; PLEC1b; LGMDR17 | NP_000436.2     |  | 9  | 0 | 2 | QuickGO | Not found |
| 7205    | TRIP6   | thyroid hormone receptor interactor 6     | OIP1; OIP-1; ZRP-1; TRIP-6; TRIP6i2                                                    | NP_003293.2     |  | 9  | 1 | 0 | QuickGO | Not found |
| 25510 1 | CFAP65  | cilia and flagella associated protein 65  | CCDC108                                                                                | NP_919278.2     |  | 8  | 0 | 0 | QuickGO | Not found |
| 64778   | FNDC3B  | fibronectin type III domain containing 3B | FAD104; PRO4979; YVTM2421                                                              | NP_073600.3     |  | 8  | 1 | 2 | QuickGO | Not found |
| 23499   | MACF1   | microtubule actin crosslinking factor 1   | ACF7; LIS9; MACF; OFC4; ABP620                                                         | NP_036222.3     |  | 8  | 1 | 0 | QuickGO | Not found |

|            |          |                                                            |                                        |                 |  |   |   |   |         |           |
|------------|----------|------------------------------------------------------------|----------------------------------------|-----------------|--|---|---|---|---------|-----------|
| 9138       | ARHGEF1  | Rho guanine nucleotide exchange factor 1                   | LSC; GEF1; LBCL2; SUB1.5; P115-RHOGEF  | NP_945353.1     |  | 6 | 1 | 1 | QuickGO | Not found |
| 722        | C4BPA    | complement component 4 binding protein alpha               | PRP; C4BP                              | NP_000706.1     |  | 6 | 0 | 0 | QuickGO | Not found |
| 10985      | GCN1     | GCN1 activator of EIF2AK4                                  | GCN1L; GCN1L1; PRIC295                 | NP_006827.1     |  | 6 | 1 | 0 | QuickGO | Not found |
| 63897      | HEATR6   | HEAT repeat containing 6                                   | ABC1                                   | NP_071353.4     |  | 6 | 0 | 0 | QuickGO | Not found |
| 14998<br>6 | LSM14B   | FT005; LSM13; FAM61B; RAP55B; C20orf40; bA11M20.3          | LSM family member 14B                  | NP_653304.2     |  | 6 | 0 | 1 | QuickGO | Not found |
| 84273      | NOA1     | nitric oxide associated 1                                  | MTG3; hNOA1; C4orf14; hAtNOS1; mAtNOS1 | NP_115689.1     |  | 6 | 1 | 0 | QuickGO | Not found |
| 9475       | ROCK2    | Rho associated coiled-coil containing protein kinase 2     | ROCK-II                                | NP_004841.2     |  | 6 | 0 | 0 | QuickGO | Not found |
| 6238       | RRBP1    | ribosome binding protein 1                                 | RRp; hES; ES130; ES/130                | NP_00135254.2.1 |  | 6 | 0 | 0 | QuickGO | Not found |
| 79048      | SECISBP2 | SECIS binding protein 2                                    | SBP2                                   | NP_076982.3     |  | 6 | 0 | 0 | QuickGO | Not found |
| 11180      | WDR6     | WD repeat domain 6                                         |                                        | NP_060501.4     |  | 6 | 0 | 3 | QuickGO | Not found |
| 51143      | DYNC1LI1 | dynein cytoplasmic 1 light intermediate chain 1            | LIC1; DLC-A; DNCL11                    | NP_057225.2     |  | 5 | 0 | 2 | QuickGO | Not found |
| 10539      | GLRX3    | glutaredoxin 3                                             | GRX3; GRX4; GLRX4; PICOT; TXNL2; TXNL3 | NP_00118679.7.1 |  | 5 | 0 | 0 | QuickGO | Not found |
| 2804       | GOLGB1   | golgin B1                                                  | GCP; GCP372; GOLIM1                    | NP_00124341.5.1 |  | 5 | 0 | 0 | QuickGO | Not found |
| 23708      | GSPT2    | G1 to S phase transition 2                                 | GST2; ERF3B                            | NP_060564.2     |  | 5 | 1 | 1 | QuickGO | Not found |
| 4644       | MYO5A    | myosin VA                                                  | GS1; MYO5; MYH12; MYR12                | NP_000250.3     |  | 5 | 0 | 0 | QuickGO | Not found |
| 55311<br>5 | PEF1     | penta-EF-hand domain containing 1                          | ABP32; PEF1A                           | NP_036524.1     |  | 5 | 0 | 0 | QuickGO | Not found |
| 55086      | RADX     | RPA1 related single stranded DNA binding protein, X-linked | CXorf57                                | NP_060485.4     |  | 5 | 0 | 1 | QuickGO | Not found |
| 81844      | TRIM56   | tripartite motif containing 56                             | RNF109                                 | NP_112223.1     |  | 5 | 0 | 0 | QuickGO | Not found |
| 55833      | UBAP2    | ubiquitin associated protein 2                             | UBAP-2                                 | NP_060919.3     |  | 5 | 0 | 0 | QuickGO | Not found |
